# Supplementary material for: An azo-bridged ring system enabled by-standing immobilization of a chiral diene ligand
Source: Royal Society of Chemistry journal article supplement (doi:10.1039/d1qo00852h), 2021-01-01

Support Information for:

## Azotic Bridge Enabled By-Standing Immobilization of Chiral Diene ligand

Ze-Jian Xue,<sup>a</sup> Han-Yu Lu,<sup>a</sup> Jian-Guo Fu,<sup>\*b</sup> Chen-Guo Feng,<sup>\*a,b</sup> Guo-Qiang Lin<sup>\*a,b,c</sup>

<sup>a</sup>Key Laboratory of Synthetic Chemistry of Natural Substances, Center for Excellence in Molecular Synthesis, Shanghai Institute of Organic Chemistry, University of Chinese Academy of Sciences, Shanghai, 200032, China.

<sup>b</sup>The Research Center of Chiral Drugs, Innovation Research Institute of Traditional Chinese Medicine, Shanghai University of Traditional Chinese Medicine, Shanghai, 201203, China.

### Table of Contents

|                                                                                                   |            |
|---------------------------------------------------------------------------------------------------|------------|
| <b>1. General information</b>                                                                     | <b>S2</b>  |
| <b>2. Preparation of chiral diene ligand 4a-4f</b>                                                | <b>S2</b>  |
| <b>3. General procedure for asymmetric rhodium-catalyzed arylation of N-tosylarylimines</b>       | <b>S10</b> |
| <b>4. Characterization and HPLC of the obtained diarylmethyltosylamide products 6a-6f</b>         | <b>S11</b> |
| <b>5. General procedure for the immobilization of ligand with silica</b>                          | <b>S17</b> |
| <b>6. The rhodium-catalyzed arylation of N-tosylarylimines with silica-L</b>                      | <b>S17</b> |
| <b>7. References</b>                                                                              | <b>S21</b> |
| <b>8. <sup>1</sup>H, <sup>13</sup>C and <sup>19</sup>F NMR spectra of compounds 3, 4, 6 and 7</b> | <b>S22</b> |

## 1. General information:

All reactions were carried out with standard Schlenk techniques under an argon atmosphere. All the solvents were dried using standard procedure and distilled before use. All commercially available chemical resources were used as received. Reactions were monitored by thin layer chromatography (TLC) supplied by Yantai Jiangyou Silicon Material Company (China). Visualization was accomplished with UV light or basic aqueous potassium permanganate (KMnO<sub>4</sub>). Chromatography was achieved using forced flow (flash chromatography) of the indicated solvent system on 300-400 mesh silica gel (Silicycle flash F60). Nuclear Magnetic Resonance (NMR) spectra were acquired on Agilent 400 or Bruker 400 instrument operating at 400, 100 and 376 MHz for <sup>1</sup>H, <sup>13</sup>C and <sup>19</sup>F, respectively. Chemical shifts are reported in δ ppm referenced to an internal SiMe<sub>4</sub> standard (TMS: δ 0.000 ppm) for <sup>1</sup>H NMR, CDCl<sub>3</sub> (δ 77.16) for <sup>13</sup>C NMR. Multiplicities are reported using the following abbreviations: s = singlet, d = doublet, t = triplet, q = quartet, quintet = quint, heptet = hept, m = multiplet, br = broad resonance. High-resolution mass spectra (HRMS) and Low-resolution mass spectrometry (LRMS) were acquired through the National Center for Organic Mass Spectrometry in Shanghai, Shanghai Institute of Organic Chemistry (CAS) and determined on a Waters Micromass GCT Premie spectrometer. X-ray photoelectron spectroscopy (XPS) was acquired through the large science instruments sharing platform of Shanghai University of Science and Technology and determined on ESCALAB 250Xi instrument for C, N.

The enantiomerically pure diketone **1** was prepared according to the literatures.<sup>1</sup> The N-tosylarylimines (**5a-f**) were prepared according to the literatures.<sup>2</sup>

## 2. Preparation of chiral diene ligand 4a-4f

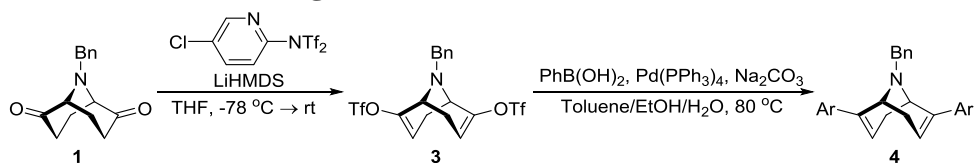

The diketone **1** (0.83 g, 3.4 mmol, 1 eq.) was dissolved in THF (50 mL), then a solution of LiHMDS in THF (1.0 M, 12 mL, 3.5 eq.) was added dropwisely at -78 °C. After stirring at -78 °C for 0.5 h, a solution of Comins reagent (4.7 g, 12 mmol, 3.5 eq.) in THF (25mL) was added dropwisely. After stirring at -78 °C for 1 h, the temperature was allowed to reach room temperature. After stirring at rt for 0.5 h, the solvent was removed. The residue was diluted with water and extracted with ethyl acetate. The organic layer was dried and concentrated under vacuum. The residue was purified by silica gel column chromatography (elute: hexane / EA = 50:1) to afford ditriflate **3** (1.4 g, 80% yield) as colorless oil.  $[\alpha]_D^{25} +1.1$  (c 1.15, CHCl<sub>3</sub>) for 99% ee. <sup>1</sup>H NMR (400 MHz, CDCl<sub>3</sub>): δ 7.39 – 7.25 (m, 5H), 5.87 (dd, *J* = 5.6, 2.2 Hz, 2H), 3.74 (d, *J* = 13.3 Hz, 1H), 3.70 (d, *J* = 13.3 Hz, 1H), 3.45 (d, *J* = 5.4 Hz, 2H), 2.67 (dd, *J* = 17.9, 4.8 Hz, 2H), 2.28 (dd, *J* = 18.0, 5.6 Hz, 2H). <sup>13</sup>C NMR (100 MHz, CDCl<sub>3</sub>): δ 147.76, 136.85, 128.83, 128.66, 128.64, 127.88, 118.53 (q, *J* = 318.7 Hz), 114.80, 55.93, 52.18, 26.28. <sup>19</sup>F NMR (376

MHz, CDCl<sub>3</sub>):  $\delta$  73.89. **ESI-MS**: 507.9 [M+H]<sup>+</sup>. **HRMS**(ESI): m/z calcd for C<sub>17</sub>H<sub>16</sub>O<sub>6</sub>NF<sub>6</sub>S<sub>2</sub> [M+H]<sup>+</sup> 508.0318, found 508.0317.

Under nitrogen, a mixture of arylboronic acid (4.0 mmol, 4.0 eq.), Pd(PPh<sub>3</sub>)<sub>4</sub> (116 mg, 10 mmol%), ditriflate **3** (0.51 mg, 1.0 mmol, 1.0 eq.), toluene (10 mL), EtOH (3.3 mL) and aqueous solution of Na<sub>2</sub>CO<sub>3</sub> (1.2 M, 5.0 mL, 6 eq.) was heated at 80 °C overnight. The reaction was quenched with saturated NH<sub>4</sub>Cl. The mixture is extracted with ethyl acetate, washed with brine. The organic layer was dried and concentrated under vacuum. The residue was purified by silica gel column chromatography to afford chiral dienes **4**.

**(1*R*,5*R*)-9-Benzyl-2,6-diphenyl-9-azabicyclo[3.3.1]nona-2,6-diene (4a)**

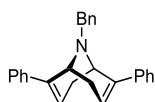

$[\alpha]_D^{25} +50.2$  (c 1.00,  $\text{CHCl}_3$ ) for 99% ee. Light yellow oil.  $^1\text{H NMR}$  (400 MHz,  $\text{CDCl}_3$ ):  $\delta$  7.52 – 7.44 (m, 2H), 7.40 – 7.34 (m, 2H), 7.30 (d,  $J = 4.2$  Hz, 9H), 7.27 – 7.19 (m, 2H), 6.04 (dd,  $J = 5.4, 2.3$  Hz, 2H), 3.94 (d,  $J = 6.4$  Hz, 2H), 3.90 (d,  $J = 13.5$  Hz, 1H), 3.81 (d,  $J = 13.1$  Hz, 1H), 2.61 (dd,  $J = 18.1, 5.6$  Hz, 2H), 1.91 (dd,  $J = 18.3, 5.2$  Hz, 2H).  $^{13}\text{C NMR}$  (100 MHz,  $\text{CDCl}_3$ ):  $\delta$  140.33, 139.29, 138.61, 129.18, 128.53, 128.49, 127.23, 127.13, 126.15, 121.19, 57.01, 52.12, 28.12. **ESI-MS**: 364.2  $[\text{M}+\text{H}]^+$ . **HRMS(DART)**:  $m/z$  calcd for  $\text{C}_{27}\text{H}_{26}\text{N}$   $[\text{M}+\text{H}]^+$  364.2060, found 364.2053. **HPLC**: Chiralcel AD-H Column; detected at 254 nm; *n*-hexane / *i*-propanol = 98/2; flow = 0.7 mL/min; Retention time: 6.7 min [(*S,S*)-**4a**], 8.6 min [(*R,R*)-**4a**].

mAU

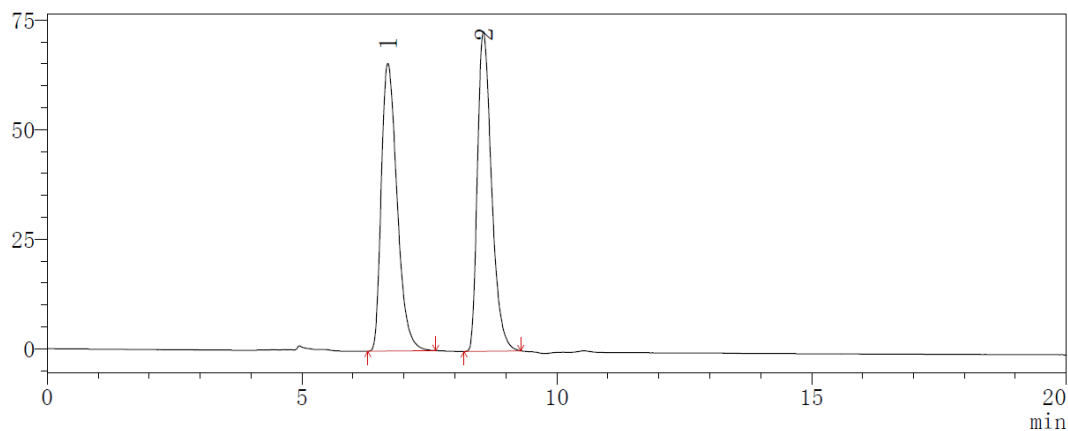

| PDA Ch1 254nm |           |         |       |
|---------------|-----------|---------|-------|
| Number        | Ret. Time | Area    | Area% |
| 1             | 6.685     | 1412828 | 50.15 |
| 2             | 8.560     | 1404363 | 49.85 |

mAU

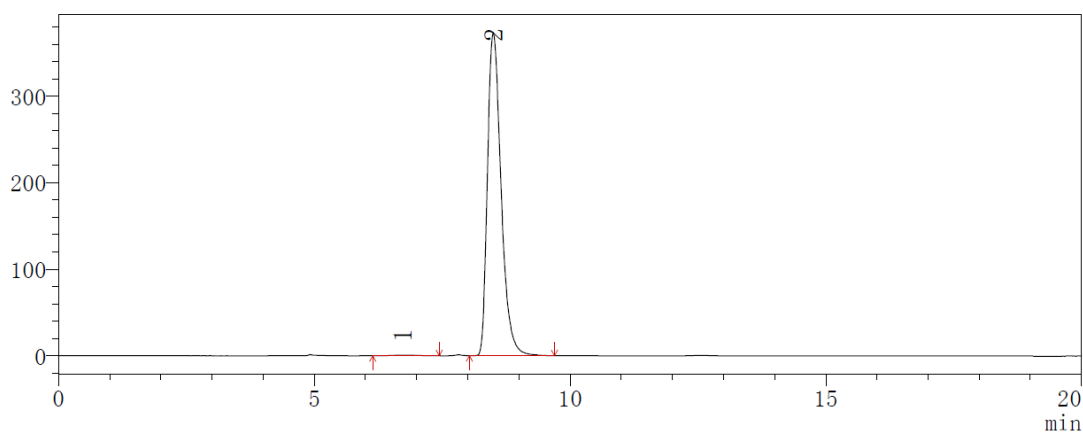

| PDA Ch1 254nm |           |         |       |
|---------------|-----------|---------|-------|
| Number        | Ret. Time | Area    | Area% |
| 1             | 6.720     | 30567   | 0.44  |
| 2             | 8.499     | 6935982 | 99.56 |

**(1*R*,5*R*)-9-Benzyl-2,6-bis(4-fluorophenyl)-9-azabicyclo[3.3.1]nona-2,6-diene (4b)**

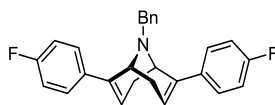

$[\alpha]_D^{25} +47.2$  (c 1.07,  $\text{CHCl}_3$ ) for 99% ee. White solid.  $^1\text{H NMR}$  (400 MHz,  $\text{CDCl}_3$ ):  $\delta$  7.47 (d,  $J = 7.2$  Hz, 2H), 7.41 – 7.33 (m, 2H), 7.33 – 7.27 (m, 1H), 7.27 – 7.19 (m, 4H), 7.05 – 6.92 (m, 4H), 6.01 – 5.92 (m, 2H), 3.92 – 3.83 (m, 3H), 3.78 (d,  $J = 13.1$  Hz, 1H), 2.59 (dd,  $J = 18.4, 6.2$  Hz, 2H), 1.86 (dd,  $J = 18.3, 5.1$  Hz, 2H).  $^{13}\text{C NMR}$  (100 MHz,  $\text{CDCl}_3$ ):  $\delta$  162.18 (d,  $J = 246.0$  Hz), 139.18, 137.83, 136.41 (d,  $J = 3.4$  Hz), 129.10, 128.54, 127.70 (d,  $J = 7.7$  Hz), 127.31, 121.06 (d,  $J = 1.4$  Hz), 115.35 (d,  $J = 21.3$  Hz), 56.99, 52.22, 27.99.  $^{19}\text{F NMR}$  (376 MHz,  $\text{CDCl}_3$ ):  $\delta$  115.71. **ESI-MS**: 400.2  $[\text{M}+\text{H}]^+$ . **HRMS(DART)**:  $m/z$  calcd for  $\text{C}_{27}\text{H}_{24}\text{NF}_2$   $[\text{M}+\text{H}]^+$  400.1871, found 400.1862. **HPLC**: Chiralcel AD-H Column; detected at 254 nm; *n*-hexane / *i*-propanol = 98/2; flow = 0.7 mL/min; Retention time: 8.0 min [(*S,S*)-**4b**], 9.9 min [(*R,R*)-**4b**].

mAU

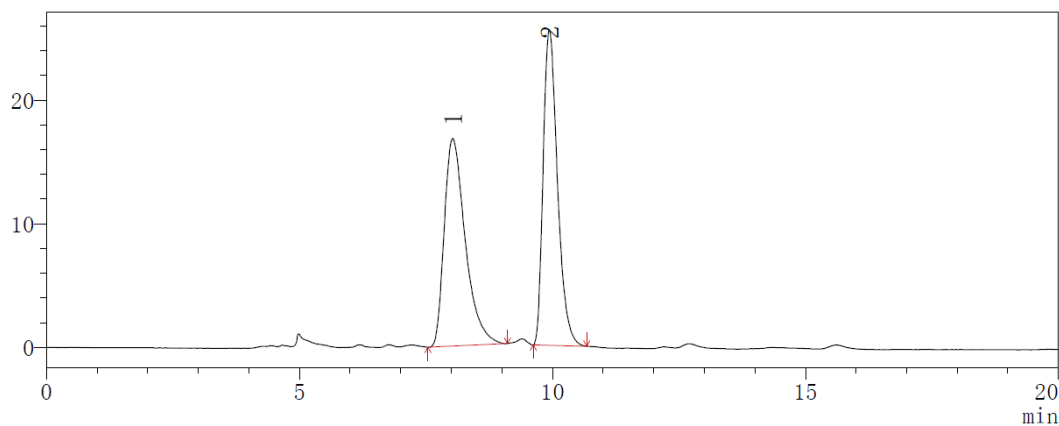

PDA Ch1 254nm

| Number | Ret. Time | Area   | Area% |
|--------|-----------|--------|-------|
| 1      | 8.030     | 484464 | 49.19 |
| 2      | 9.938     | 500460 | 50.81 |

mAU

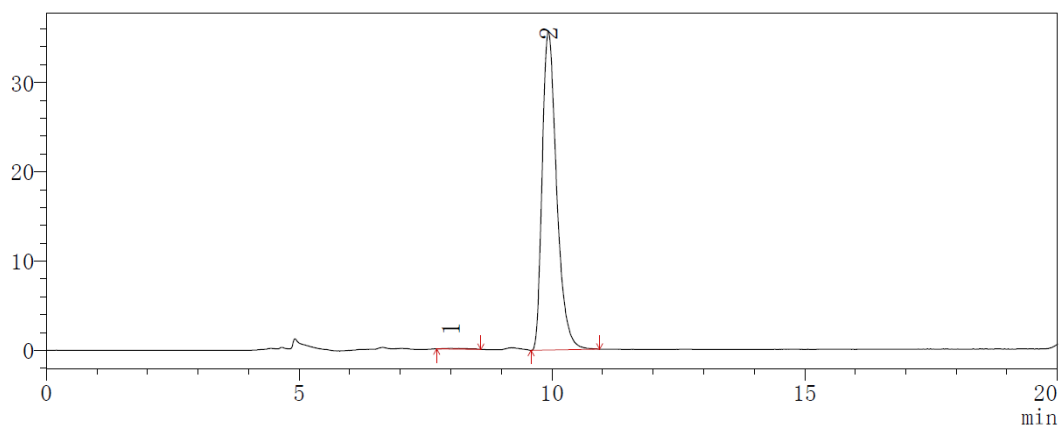

PDA Ch1 254nm

| Number | Ret. Time | Area   | Area% |
|--------|-----------|--------|-------|
| 1      | 7.994     | 2602   | 0.37  |
| 2      | 9.930     | 708605 | 99.63 |

**(1*R*,5*R*)-9-Benzyl-2,6-bis(4-methoxyphenyl)-9-azabicyclo[3.3.1]nona-2,6-die (4c)**

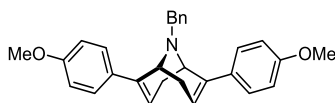

$[\alpha]_D^{25} +28.1$  (c 1.20,  $\text{CHCl}_3$ ) for 99% ee. Dark yellow solid.  $^1\text{H NMR}$  (400 MHz,  $\text{CDCl}_3$ ):  $\delta$  7.47 (d,  $J = 7.2$  Hz, 2H), 7.38 – 7.31 (m, 2H), 7.31 – 7.25 (m, 1H), 7.22 (d,  $J = 8.7$  Hz, 4H), 6.83 (d,  $J = 8.7$  Hz, 4H), 5.94 (dd,  $J = 5.3, 2.3$  Hz, 2H), 3.91 – 3.79 (m, 4H), 3.77 (s, 6H), 2.59 (dd,  $J = 17.9, 5.7$  Hz, 2H), 1.89 (dd,  $J = 18.2, 5.3$  Hz, 2H).  $^{13}\text{C NMR}$  (100 MHz,  $\text{CDCl}_3$ ):  $\delta$  158.80, 139.40, 137.86, 132.90, 129.13, 128.42, 127.13, 127.08, 119.57, 113.84, 56.97, 55.32, 52.12, 28.10. **ESI-MS**: 424.2  $[\text{M}+\text{H}]^+$ . **HRMS(ESI)**:  $m/z$  calcd for  $\text{C}_{29}\text{H}_{30}\text{O}_2\text{N}$   $[\text{M}+\text{H}]^+$  424.2271, found 424.2271. **HPLC**: Chiralcel AD-H Column; detected at 254 nm; *n*-hexane / *i*-propanol = 98/2; flow = 0.7 mL/min; Retention time: 14.3 min [(*S,S*)-**4c**], 23.5 min [(*R,R*)-**4c**].

mAU

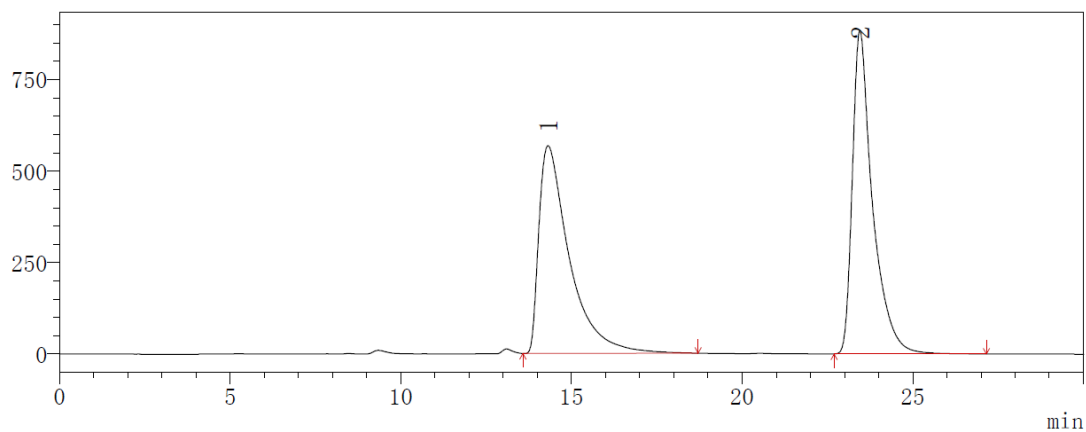

PDA Ch1 254nm

| Number | Ret. Time | Area     | Area% |
|--------|-----------|----------|-------|
| 1      | 14.314    | 35191080 | 49.19 |
| 2      | 23.450    | 36351641 | 50.81 |

mAU

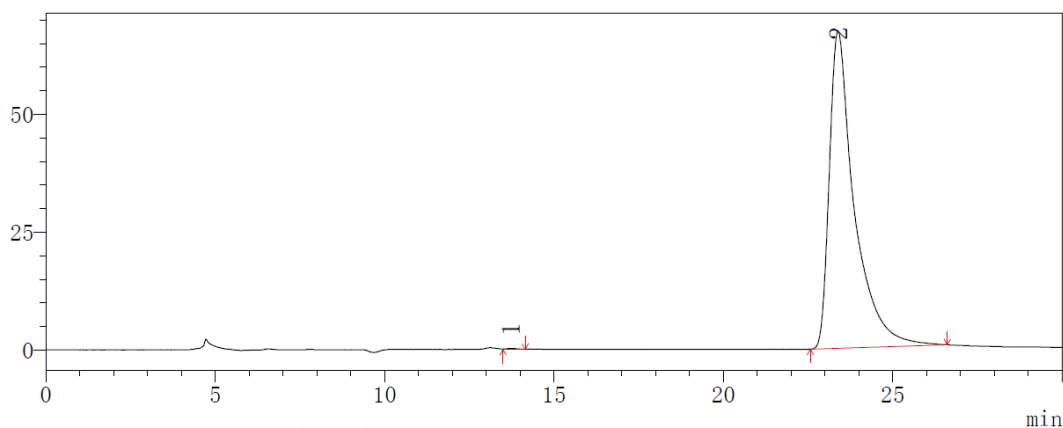

PDA Ch1 254nm

| Number | Ret. Time | Area    | Area% |
|--------|-----------|---------|-------|
| 1      | 13.721    | 5808    | 0.17  |
| 2      | 23.386    | 3458606 | 99.83 |

**(1*R*,5*R*)-9-Benzyl-2,6-bis(3,5-dimethylphenyl)-9-azabicyclo[3.3.1]nona-2,6-diene (4d)**

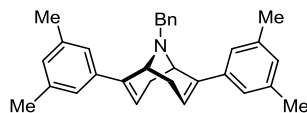

$[\alpha]_D^{25} +68.8$  (c 1.00, CHCl<sub>3</sub>) for 99% ee. White solid. **<sup>1</sup>H NMR** (400 MHz, CDCl<sub>3</sub>):  $\delta$  7.49 (d,  $J$  = 7.1 Hz, 2H), 7.40 – 7.33 (m, 2H), 7.33 – 7.26 (m, 1H), 6.91 (s, 4H), 6.88 (s, 2H), 5.98 (dd,  $J$  = 4.8, 1.8 Hz, 2H), 3.93 – 3.68 (m, 4H), 2.58 (dd,  $J$  = 18.0, 5.6 Hz, 2H), 2.29 (s, 12H), 1.89 (dd,  $J$  = 18.3, 5.3 Hz, 2H). **<sup>13</sup>C NMR** (100 MHz, CDCl<sub>3</sub>):  $\delta$  140.56, 139.48, 138.84, 137.85, 129.25, 128.78, 128.41, 127.17, 124.15, 120.88, 56.98, 52.31, 28.15, 21.53. **ESI-MS**: 420.2 [M+H]<sup>+</sup>. **HRMS(ESI)**:  $m/z$  calcd for C<sub>31</sub>H<sub>34</sub>N [M+H]<sup>+</sup> 420.2686, found 420.2685. **HPLC**: Chiralcel AD-H Column; detected at 254 nm; *n*-hexane / *i*-propanol = 99/1; flow = 0.7 mL/min; Retention time: 5.7 min [(*S,S*)-**4d**], 6.8 min [(*R,R*)-**4d**].

mAU

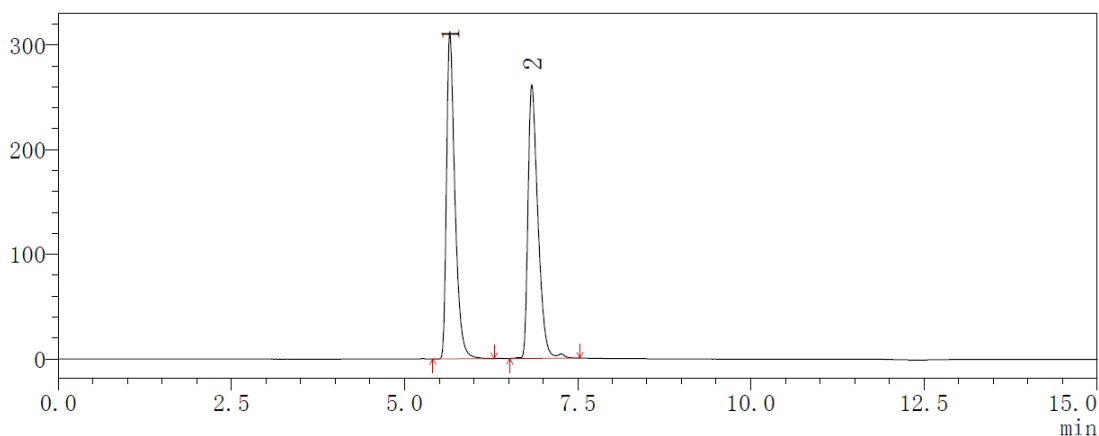

PDA Ch1 254nm

| Number | Ret. Time | Area    | Area% |
|--------|-----------|---------|-------|
| 1      | 5.653     | 2649280 | 50.32 |
| 2      | 6.838     | 2615944 | 49.68 |

mAU

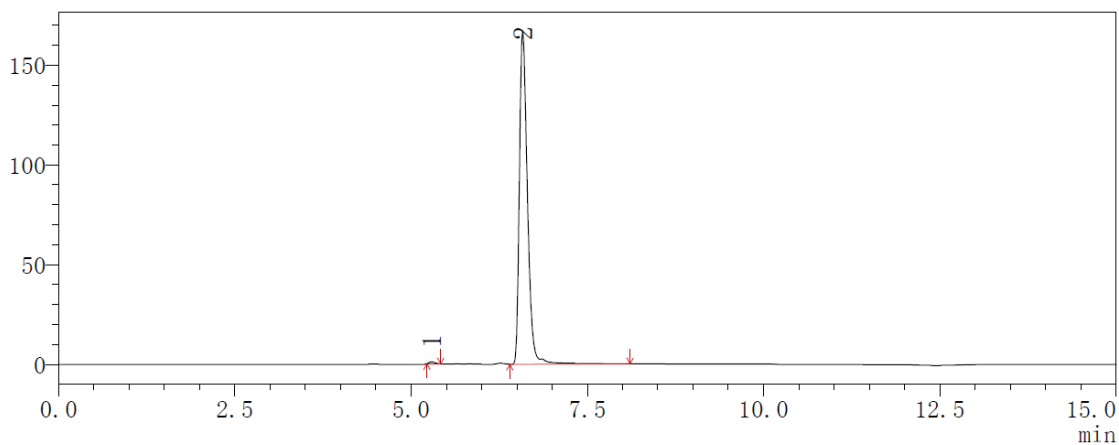

PDA Ch1 254nm

| Number | Ret. Time | Area    | Area% |
|--------|-----------|---------|-------|
| 1      | 5.288     | 5379    | 0.40  |
| 2      | 6.583     | 1330474 | 99.60 |

**(1*R*,5*R*)-9-Benzyl-2,6-di(naphthalen-1-yl)-9-azabicyclo[3.3.1]nona-2,6-diene (4e)**

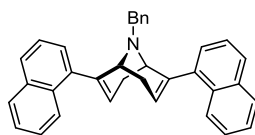

$[\alpha]_D^{25} +108.2$  (c 1.13,  $\text{CHCl}_3$ ) for 99% ee. White solid.  $^1\text{H NMR}$  (400 MHz,  $\text{CDCl}_3$ ):  $\delta$  8.18 (d,  $J = 7.7$  Hz, 2H), 7.84 (d,  $J = 7.1$  Hz, 2H), 7.76 (d,  $J = 8.1$  Hz, 2H), 7.64 (d,  $J = 7.3$  Hz, 2H), 7.54 – 7.42 (m, 6H), 7.42 – 7.35 (m, 2H), 7.35 – 7.24 (m, 3H), 5.89 (d,  $J = 3.6$  Hz, 2H), 4.14 (d,  $J = 13.5$  Hz, 1H), 4.05 (d,  $J = 13.5$  Hz, 1H), 3.82 (d,  $J = 5.7$  Hz, 2H), 2.51 (dd,  $J = 17.9, 4.8$  Hz, 2H), 1.96 (dd,  $J = 18.1, 4.9$  Hz, 2H).  $^{13}\text{C NMR}$  (100 MHz,  $\text{CDCl}_3$ ):  $\delta$  140.34, 139.17, 133.91, 132.41, 128.87, 128.50, 128.43, 127.46, 127.26, 126.42, 125.97, 125.88, 125.88, 125.84, 125.45, 124.18, 57.14, 55.42, 27.01. **DART-MS**: 464.2  $[\text{M}+\text{H}]^+$ . **HRMS(DART)**:  $m/z$  calcd for  $\text{C}_{35}\text{H}_{30}\text{N}$   $[\text{M}+\text{H}]^+$  464.2373, found 464.2374. **HPLC**: Chiralcel AD-H Column; detected at 254 nm; *n*-hexane / *i*-propanol = 98/2; flow = 0.7 mL/min; Retention time: 6.7 min [(*S,S*)-**4e**], 8.0 min [(*R,R*)-**4e**].

mAU

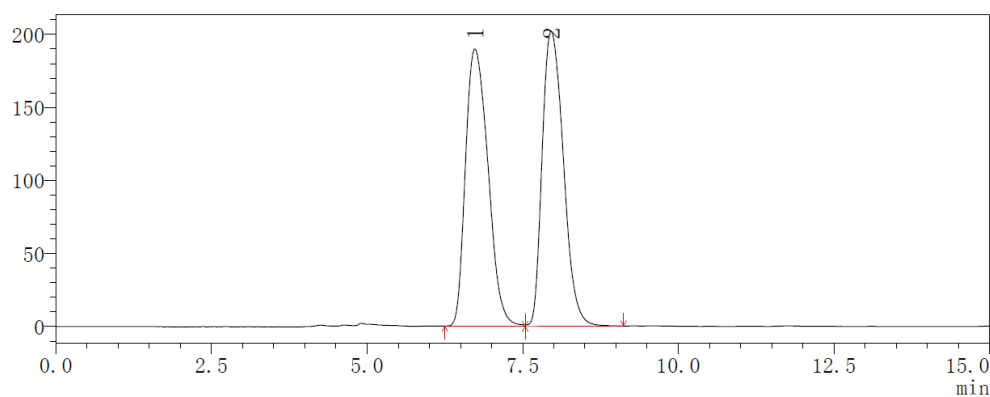

PDA Ch1 254nm

| Number | Ret. Time | Area    | Area% |
|--------|-----------|---------|-------|
| 1      | 6.732     | 4798028 | 50.10 |
| 2      | 7.958     | 4779027 | 49.90 |

mAU

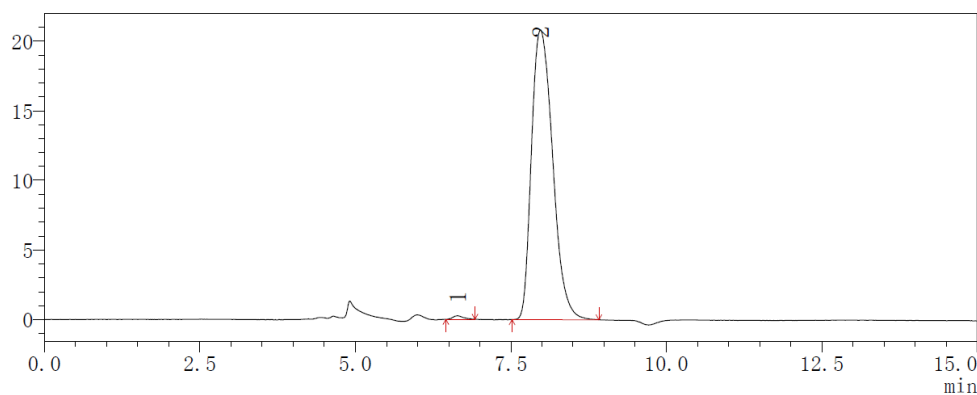

PDA Ch1 254nm

| Number | Ret. Time | Area   | Area% |
|--------|-----------|--------|-------|
| 1      | 6.641     | 3059   | 0.62  |
| 2      | 7.976     | 492183 | 99.38 |



**(1*R*,5*R*)-9-Benzyl-2,6-di(naphthalen-2-yl)-9-azabicyclo[3.3.1]nona-2,6-diene (4f)**

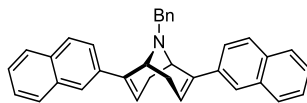

$[\alpha]_D^{25}$  -91.7 (c 1.00, CHCl<sub>3</sub>) for 99% ee. White solid. <sup>1</sup>H NMR (400 MHz, CDCl<sub>3</sub>): δ 7.84 – 7.74 (m, 6H), 7.71 (s, 2H), 7.58 – 7.50 (m, 4H), 7.49 – 7.38 (m, 6H), 7.38 – 7.31 (m, 1H), 6.22 (dd, *J* = 5.3, 2.3 Hz, 2H), 4.15 (d, *J* = 6.2 Hz, 2H), 4.01 (d, *J* = 13.1 Hz, 1H), 3.91 (d, *J* = 13.1 Hz, 1H), 2.74 (dd, *J* = 18.6, 6.3 Hz, 2H), 2.05 (dd, *J* = 18.4, 5.3 Hz, 2H). <sup>13</sup>C NMR (100 MHz, CDCl<sub>3</sub>): δ 138.33, 137.39, 133.61, 132.73, 129.38, 128.59, 128.19, 128.11, 127.66, 127.43, 126.28, 125.83, 124.73, 124.46, 121.94, 57.07, 52.11, 28.44. (one carbon signal overlapped) **DART-MS**: 464.2 [M+H]<sup>+</sup>. **HRMS(DART)**: *m/z* calcd for C<sub>35</sub>H<sub>30</sub>N [M+H]<sup>+</sup> 464.2373, found 464.2369. **HPLC**: Chiralcel AS-H Column; detected at 254 nm; *n*-hexane / *i*-propanol = 99/1; flow = 0.7 mL/min; Retention time: 8.6 min [(*S*, *S*)-**4f**], 10.1 min [(*R*, *R*)-**4f**].

mAU

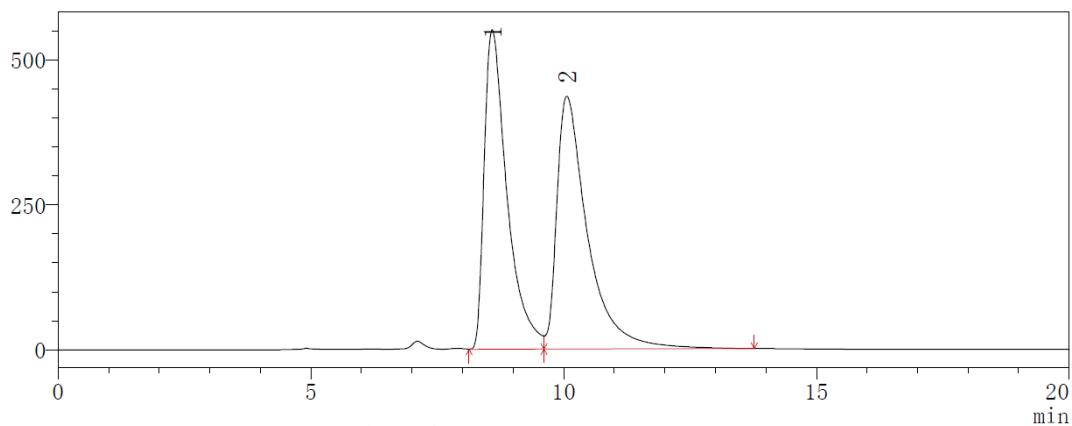

PDA Ch1 254nm

| Number | Ret. Time | Area     | Area% |
|--------|-----------|----------|-------|
| 1      | 8.587     | 17311320 | 48.42 |
| 2      | 10.064    | 18440306 | 51.58 |

mAU

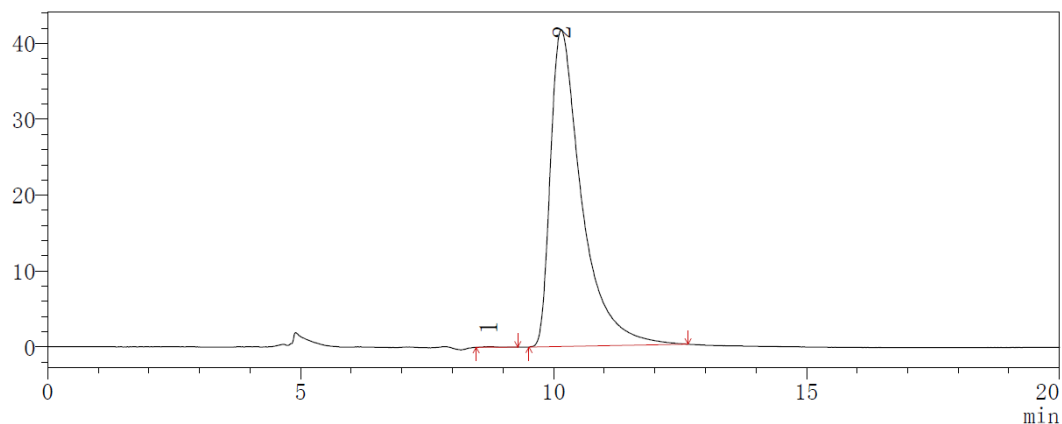

PDA Ch1 254nm

| Number | Ret. Time | Area    | Area% |
|--------|-----------|---------|-------|
| 1      | 8.706     | 1246    | 0.07  |
| 2      | 10.153    | 1790872 | 99.93 |

### 3. General procedure for asymmetric rhodium-catalyzed arylation of *N*-tosylarylimines

Under nitrogen, to a Schlenk flask charged with *N*-tosylarylimine **5** (0.20 mmol, 1.0 eq.), arylboronic acid (0.40 mmol, 2.0 eq.),  $[\text{RhCl}(\text{C}_2\text{H}_4)_2]_2$  (2.0 mg, 0.0050 mmol, 2.5 mol%), chiral diene ligand **4f** (4.6 mg, 0.010 mmol, 5.0 mol%), KF (26 mg, 0.44 mmol, 2.2 eq.) was added 2.0 mL of toluene and 0.40 mL of water. The mixture was heated to 30 °C and stirred for 2 h. The solvent was removed and the residue was purified by silica gel column chromatography to afford the desired diarylmethylamine product **6**.

#### 4. Characterization of the obtained products 6a-6f

##### (*S*)-*N*-((4-methoxyphenyl)(phenyl)methyl)-4-methylbenzenesulfonamide (**6a**)<sup>3</sup>

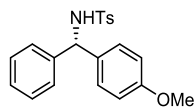

$[\alpha]_{\text{D}}^{25}$  -24.6 (*c* 1.07,  $\text{CHCl}_3$ ) for 96% ee [lit.  $[\alpha]_{\text{D}}^{20}$  -19.7 (*c* 1.03,  $\text{CHCl}_3$ ) for 99% ee in the *S*-isomer; *J. Am. Chem. Soc.* **2004**, *126*, 13584.]. White solid.  $^1\text{H NMR}$  (400 MHz,  $\text{CDCl}_3$ ):  $\delta$  7.54 (d, *J* = 8.2 Hz, 2H), 7.21 – 7.15 (m, 2H), 7.14 – 7.05 (m, 4H), 6.99 (d, *J* = 8.6 Hz, 2H), 6.70 (d, *J* = 8.7 Hz, 2H), 5.51 (d, *J* = 7.3 Hz, 1H), 5.44 (d, *J* = 7.3 Hz, 1H), 3.72 (s, 3H), 2.36 (s, 3H). **ESI-MS**: 197.1  $[\text{M}+\text{H}-\text{TsNH}_2]^+$ , 390.0  $[\text{M}+\text{Na}]^+$ , 406.1  $[\text{M}+\text{K}]^+$ . **HPLC**: Chiralcel PC-H Column; detected at 200 nm; *n*-hexane / *i*-propanol = 70/30; flow = 0.7 mL/min; Retention time: 24.3 min [*S*]-**6a**], 27.1 min [*R*]-**6a**].

mAU

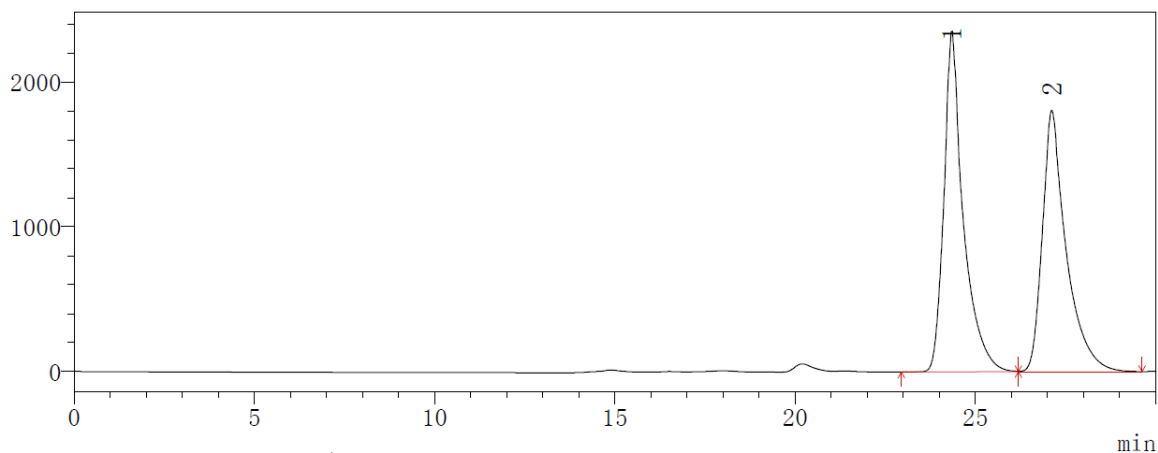

PDA Ch1 210nm

| Number | Ret. Time | Area     | Area% |
|--------|-----------|----------|-------|
| 1      | 24.335    | 87806799 | 51.48 |
| 2      | 27.117    | 82763657 | 48.52 |

mAU

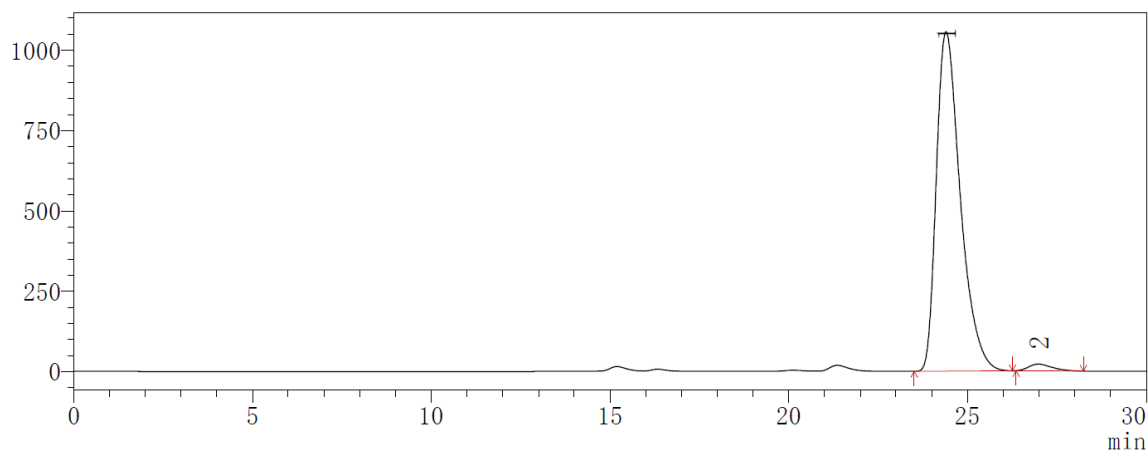

PDA Ch1 234nm

| Number | Ret. Time | Area     | Area% |
|--------|-----------|----------|-------|
| 1      | 24.399    | 49308623 | 98.10 |
| 2      | 26.987    | 955757   | 1.90  |

**(S)-4-methyl-N-(phenyl(p-tolyl)methyl)benzenesulfonamide (6b)**<sup>4</sup>

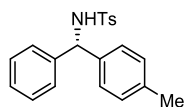

$[\alpha]_D^{25}$  -10.6 (*c* 1.27, CHCl<sub>3</sub>) for 96% ee [lit.  $[\alpha]_D^{20}$  +12.7 (*c* 0.97, CHCl<sub>3</sub>) for 99% ee in the *R*-isomer; *J. Am. Chem. Soc.* **2007**, *129*, 5336.]. White solid. **<sup>1</sup>H NMR** (400 MHz, CDCl<sub>3</sub>): δ 7.55 (d, *J* = 8.1 Hz, 2H), 7.21 – 7.15 (m, 3H), 7.14 – 7.06 (m, 4H), 7.02 – 6.93 (m, 4H), 5.51 (d, *J* = 7.2 Hz, 1H), 5.28 (d, *J* = 7.2 Hz, 1H), 2.37 (s, 3H), 2.27 (s, 3H). **<sup>13</sup>C NMR** (100 MHz, CDCl<sub>3</sub>): δ 143.22, 140.81, 137.77, 137.48, 137.41, 129.43, 129.31, 128.59, 127.55, 127.41, 127.39, 127.32, 61.22, 21.59, 21.14. **ESI-MS**: 181.1 [M+H-TsNH<sub>2</sub>]<sup>+</sup>, 374.0 [M+Na]<sup>+</sup>. **HPLC**: Chiralcel OD-H Column; detected at 224 nm; *n*-hexane / *i*-propanol = 70/30; flow = 0.7 mL/min; Retention time: 6.8 min [(*S*)-**6b**], 8.0 min [(*R*)-**6b**].

mAU

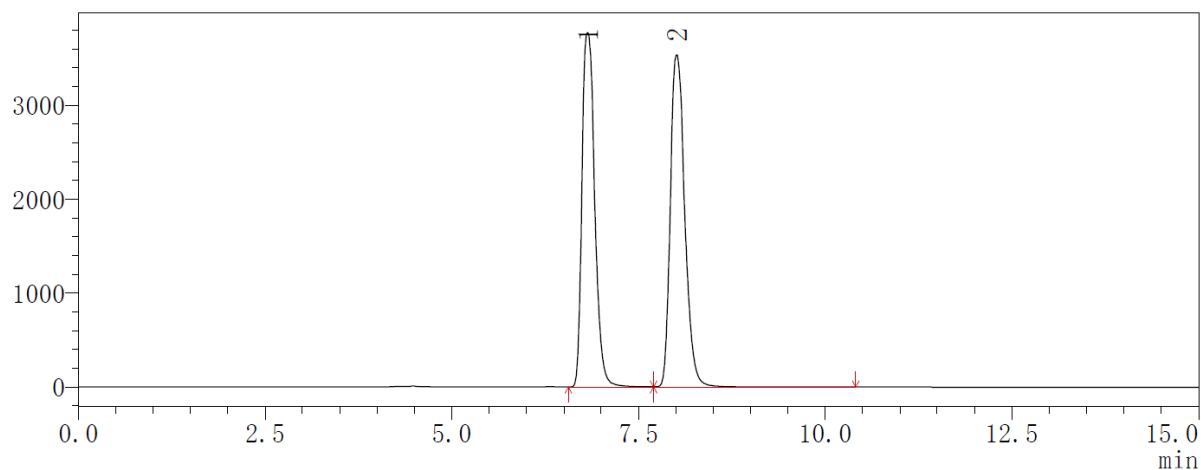

| PDA Ch1 224nm |           |          |       |
|---------------|-----------|----------|-------|
| Number        | Ret. Time | Area     | Area% |
| 1             | 6.821     | 45007714 | 48.73 |
| 2             | 8.015     | 47348875 | 51.27 |

mAU

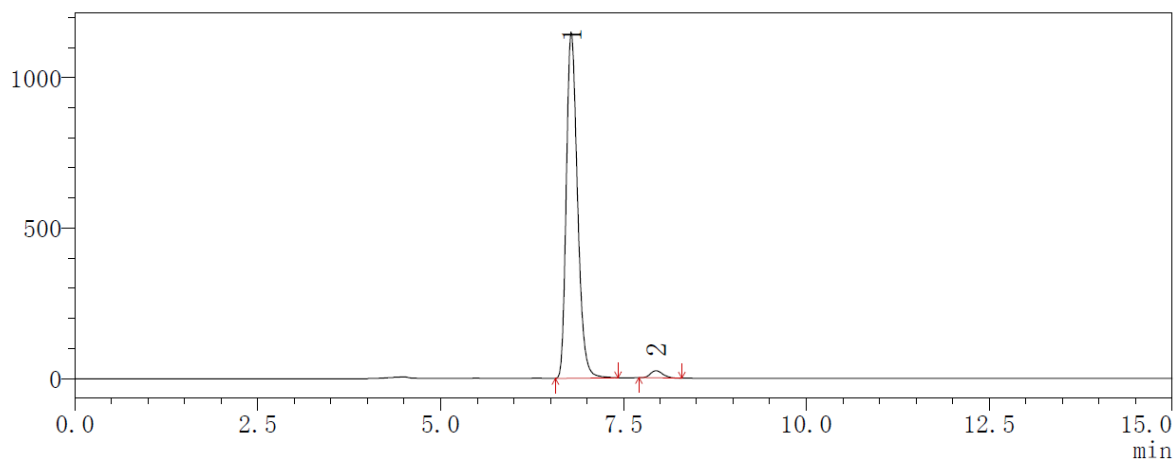

| PDA Ch1 224nm |           |          |       |
|---------------|-----------|----------|-------|
| Number        | Ret. Time | Area     | Area% |
| 1             | 6.786     | 12242127 | 97.77 |
| 2             | 7.947     | 278620   | 2.23  |

**(S)-N-((4-methoxyphenyl)(p-tolyl)methyl)-4-methylbenzenesulfonamide (6c)<sup>4</sup>**

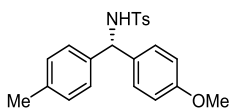

$[\alpha]_D^{25}$  -6.8 (c 1.07, CHCl<sub>3</sub>) for 96% ee [lit.  $[\alpha]_D^{20}$  -7.5 (c 1.03, CHCl<sub>3</sub>) for 98% ee in the *S*-isomer; *J. Am. Chem. Soc.* **2007**, *129*, 5336.]. White solid. <sup>1</sup>H NMR (400 MHz, CDCl<sub>3</sub>): δ 7.53 (d, *J* = 8.3 Hz, 2H), 7.10 (d, *J* = 8.1 Hz, 2H), 7.02 – 6.93 (m, 6H), 6.69 (d, *J* = 8.7 Hz, 2H), 5.50 – 5.40 (m, 2H), 3.72 (s, 3H), 2.36 (s, 3H), 2.26 (s, 3H). <sup>13</sup>C NMR (100 MHz, CDCl<sub>3</sub>): δ 158.92, 143.05, 137.98, 137.58, 137.16, 133.06, 129.35, 129.20, 128.62, 127.27, 113.88, 60.69, 55.30, 21.53, 21.08. **ESI-MS**: 211.1 [M+H-TsNH<sub>2</sub>]<sup>+</sup>, 404.0 [M+Na]<sup>+</sup>. **HPLC**: Chiralcel OD-H Column; detected at 214 nm; *n*-hexane / *i*-propanol = 70/30; flow = 0.7 mL/min; Retention time: 9.0 min [(*S*)-**6c**], 9.7 min [(*R*)-**6c**].

mAU

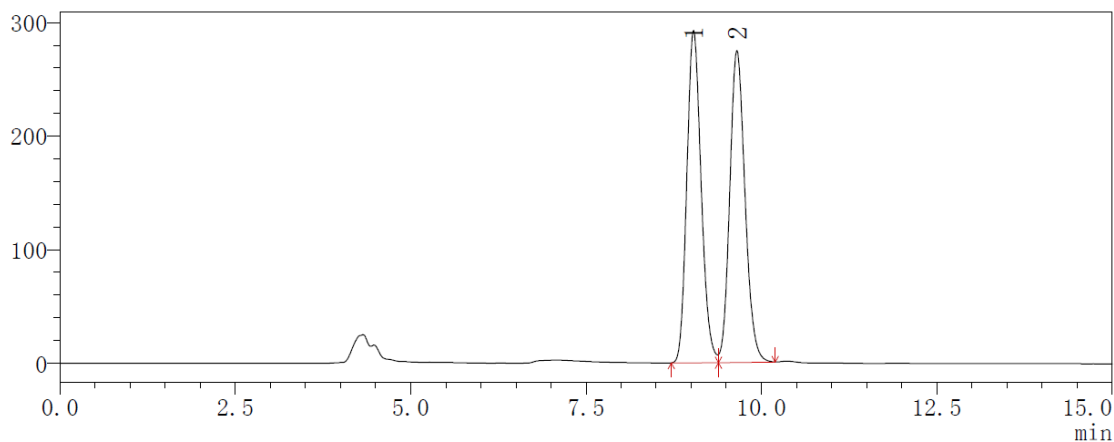

PDA Ch1 214nm

| Number | Ret. Time | Area    | Area% |
|--------|-----------|---------|-------|
| 1      | 9.031     | 4149569 | 49.90 |
| 2      | 9.651     | 4166568 | 50.10 |

mAU

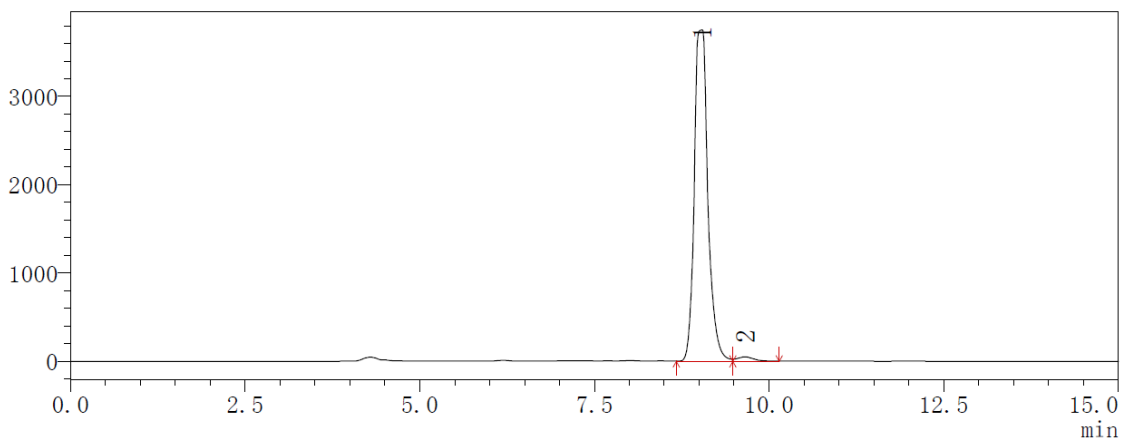

PDA Ch1 214nm

| Number | Ret. Time | Area     | Area% |
|--------|-----------|----------|-------|
| 1      | 9.040     | 50804397 | 98.37 |
| 2      | 9.654     | 842626   | 1.63  |

**(S)-N-((4-methoxyphenyl)(4-(trifluoromethyl)phenyl)methyl)-4-methylbenzenesulfonamide (6d)<sup>5</sup>**

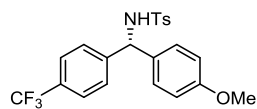

$[\alpha]_D^{25}$  -20.6 (*c* 1.00, CHCl<sub>3</sub>) for 90% ee [lit.  $[\alpha]_D^{27}$  -26.6 (*c* 1.03, CHCl<sub>3</sub>) for 94% ee in the *S*-isomer; *Org. Lett.* **2010**, *17*, 3820.]. White solid. <sup>1</sup>H NMR (400 MHz, CDCl<sub>3</sub>): δ 7.53 (d, *J* = 8.1 Hz, 2H), 7.43 (d, *J* = 8.1 Hz, 2H), 7.29 – 7.21 (m, 2H), 7.13 (d, *J* = 8.0 Hz, 2H), 6.94 (d, *J* = 8.6 Hz, 2H), 6.74 (d, *J* = 8.6 Hz, 2H), 5.56 (d, *J* = 6.9 Hz, 1H), 5.31 – 5.17 (m, 1H), 3.75 (s, 3H), 2.37 (s, 3H). **ESI-MS**: 265.0 [M+H-TsNH<sub>2</sub>]<sup>+</sup>, 458.0 [M+Na]<sup>+</sup>. **HPLC**: Chiralcel OD-H Column; detected at 214 nm; *n*-hexane / *i*-propanol = 70/30; flow = 0.7 mL/min; Retention time: 9.8 min [(*S*)-**6d**], 10.9 min [(*R*)-**6d**].

mAU

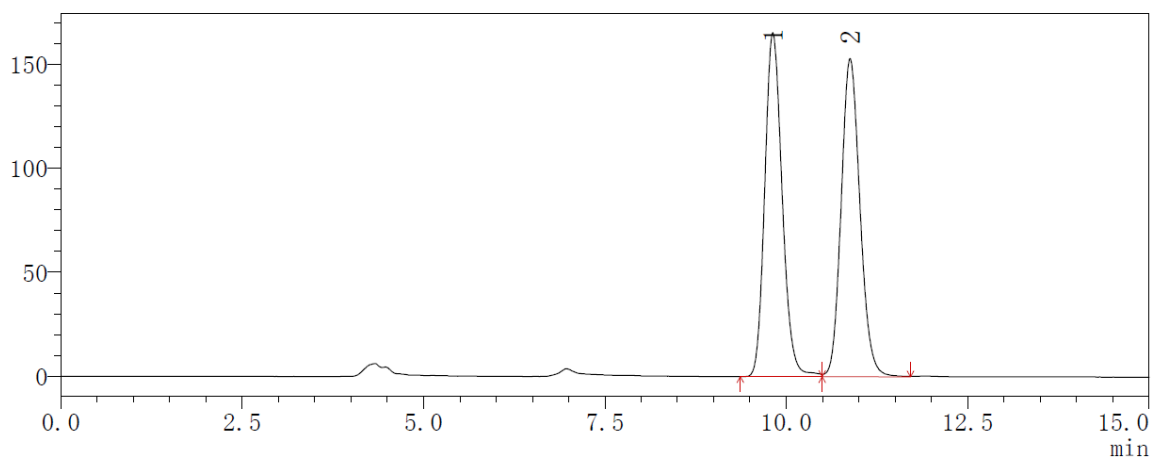

PDA Ch1 234nm

| Number | Ret. Time | Area    | Area% |
|--------|-----------|---------|-------|
| 1      | 9.814     | 2747907 | 49.92 |
| 2      | 10.878    | 2756465 | 50.08 |

mAU

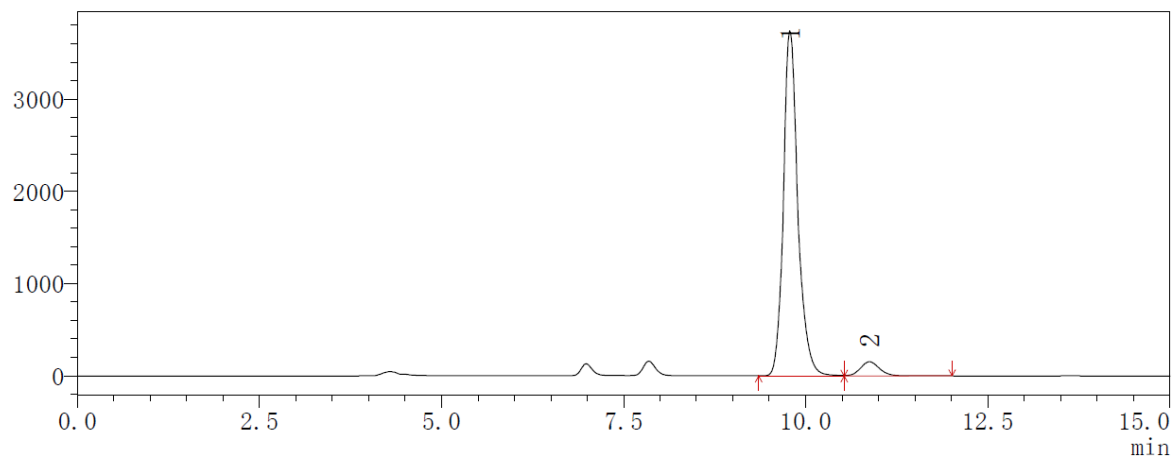

PDA Ch1 214nm

| Number | Ret. Time | Area     | Area% |
|--------|-----------|----------|-------|
| 1      | 9.783     | 51473517 | 94.86 |
| 2      | 10.874    | 2786575  | 5.14  |

**(R)-N-((4-bromophenyl)(4-methoxyphenyl)methyl)-4-methylbenzenesulfonamide (6e)**

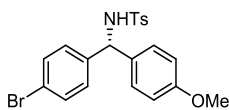

$[\alpha]_D^{25}$  -9.9 (c 1.27,  $\text{CHCl}_3$ ) for 97% ee. White solid.  $^1\text{H NMR}$  (400 MHz,  $\text{CDCl}_3$ ):  $\delta$  7.52 (d,  $J = 8.3$  Hz, 2H), 7.29 (d,  $J = 8.5$  Hz, 2H), 7.11 (d,  $J = 8.0$  Hz, 2H), 6.99 (d,  $J = 8.3$  Hz, 2H), 6.94 (d,  $J = 8.6$  Hz, 2H), 6.70 (d,  $J = 8.7$  Hz, 2H), 5.65 (d,  $J = 7.5$  Hz, 1H), 5.45 (d,  $J = 7.5$  Hz, 1H), 3.72 (s, 3H), 2.38 (s, 3H).  $^{13}\text{C NMR}$  (100 MHz,  $\text{CDCl}_3$ ):  $\delta$  159.17, 143.41, 139.90, 137.33, 132.29, 131.55, 129.47, 129.16, 128.62, 127.23, 121.45, 114.10, 60.39, 55.34, 21.58. **ESI-MS**: 468.0  $[\text{M}+\text{Na}]^+$ . **HRMS**(ESI):  $m/z$  calcd for  $\text{C}_{22}\text{H}_{20}\text{O}_3\text{NBrNaS}$   $[\text{M}+\text{Na}]^+$  468.0239, found 468.0246. **HPLC**: Chiralcel OD-H Column; detected at 205 nm;  $n$ -hexane /  $i$ -propanol = 70/30; flow = 0.7 mL/min; Retention time: 10.3 min [(*R*)-**6e**], 11.8 min [(*S*)-**6e**].

mAU

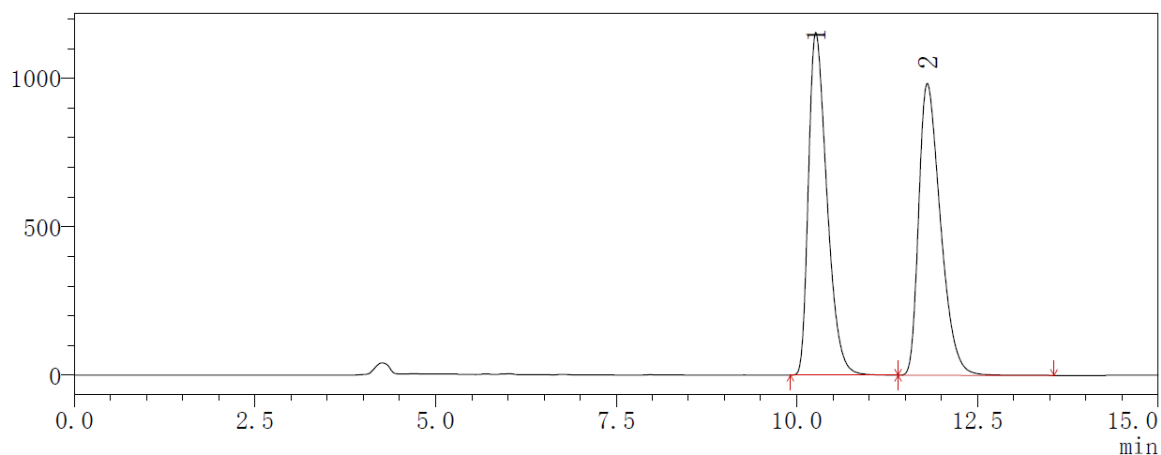

PDA Ch1 254nm

| Number | Ret. Time | Area     | Area% |
|--------|-----------|----------|-------|
| 1      | 10.262    | 20609051 | 50.01 |
| 2      | 11.804    | 20598620 | 49.99 |

mAU

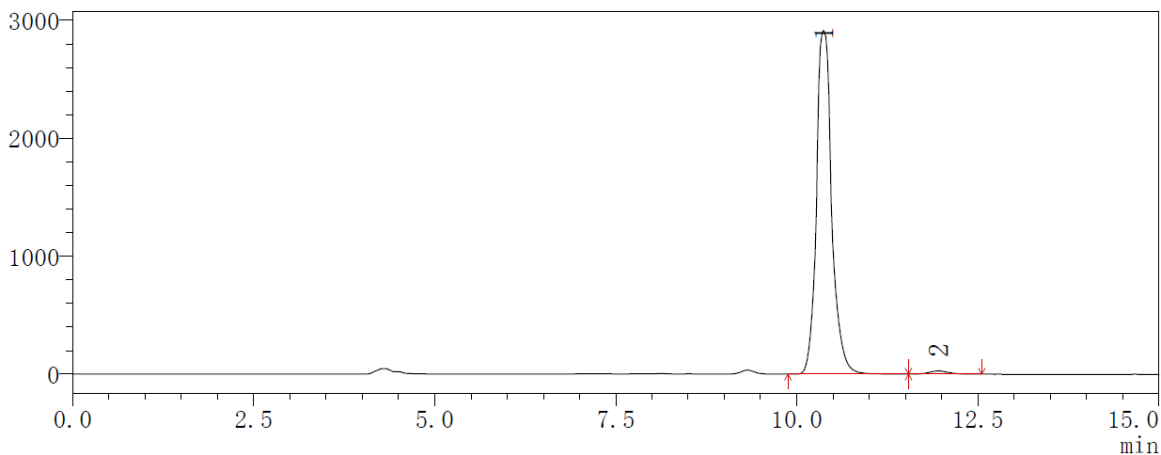

PDA Ch1 205nm

| Number | Ret. Time | Area     | Area% |
|--------|-----------|----------|-------|
| 1      | 10.368    | 42914677 | 98.75 |
| 2      | 11.951    | 543687   | 1.25  |

**(R)-N-((4-methoxyphenyl)(naphthalen-2-yl)methyl)-4-methylbenzenesulfonamide (6f)<sup>6</sup>**

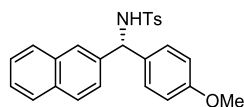

$[\alpha]_{\text{D}}^{25}$  -2.5 (c 1.27,  $\text{CHCl}_3$ ) for 97% ee [lit.  $[\alpha]_{\text{D}}^{20}$  +8.1 (c 0.55,  $\text{CHCl}_3$ ) for 98% ee in the *S*-isomer; *RSC Adv.* **2019**, 9, 25377.]. White solid. <sup>1</sup>H NMR (400 MHz,  $\text{CDCl}_3$ ):  $\delta$  7.76 – 7.68 (m, 1H), 7.66 – 7.57 (m, 2H), 7.55 – 7.46 (m, 3H), 7.45 – 7.37 (m, 2H), 7.17 (d,  $J$  = 8.4 Hz, 1H), 7.03 (d,  $J$  = 8.5 Hz, 2H), 6.97 (d,  $J$  = 7.9 Hz, 2H), 6.70 (d,  $J$  = 8.5 Hz, 2H), 5.68 (d,  $J$  = 7.6 Hz, 1H), 5.60 (d,  $J$  = 7.6 Hz, 1H), 3.71 (s, 3H), 2.22 (s, 3H). **ESI-MS**: 247.1  $[\text{M}+\text{H}-\text{TsNH}_2]^+$ , 440.0  $[\text{M}+\text{Na}]^+$ . **HPLC**: Chiralcel OD-H Column; detected at 214 nm; *n*-hexane / *i*-propanol = 75/25; flow = 0.7 mL/min; Retention time: 12.3 min [*R*]-**6f**], 17.0 min [*S*]-**6f**].

mAU

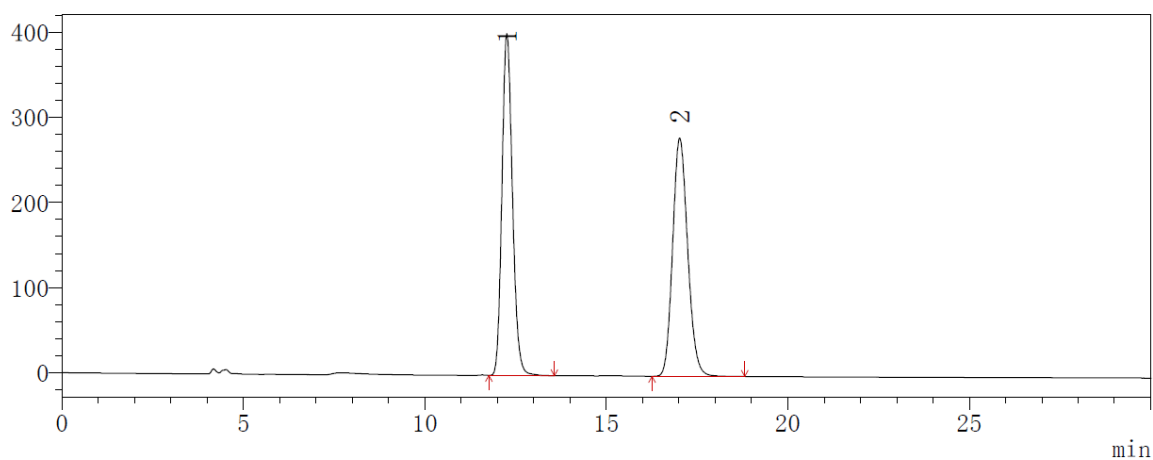

PDA Ch1 214nm

| Number | Ret. Time | Area    | Area% |
|--------|-----------|---------|-------|
| 1      | 12.258    | 8083917 | 50.04 |
| 2      | 17.020    | 8070371 | 49.96 |

mAU

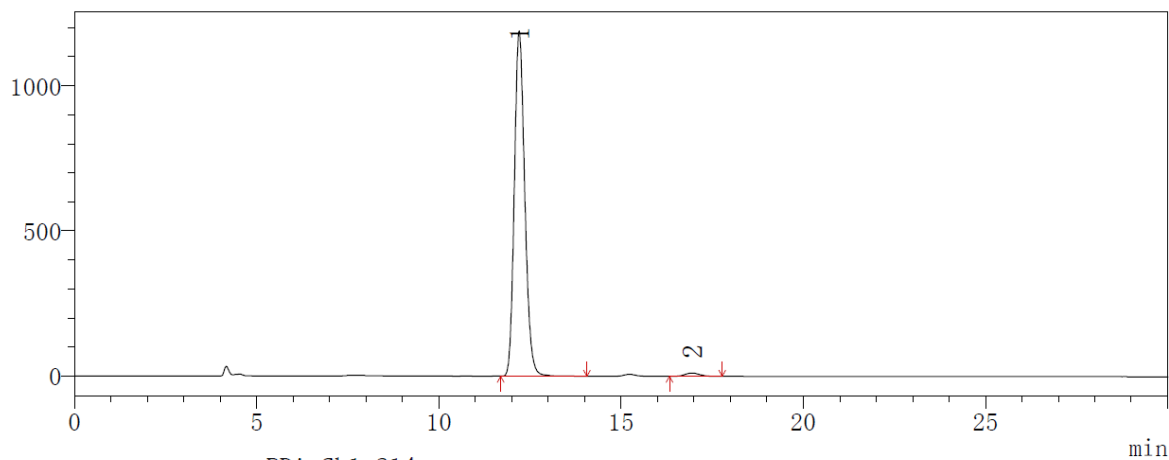

PDA Ch1 214nm

| Number | Ret. Time | Area     | Area% |
|--------|-----------|----------|-------|
| 1      | 12.202    | 23726641 | 98.64 |
| 2      | 16.944    | 326098   | 1.36  |



## 5. General procedure for the immobilization of ligand with silica

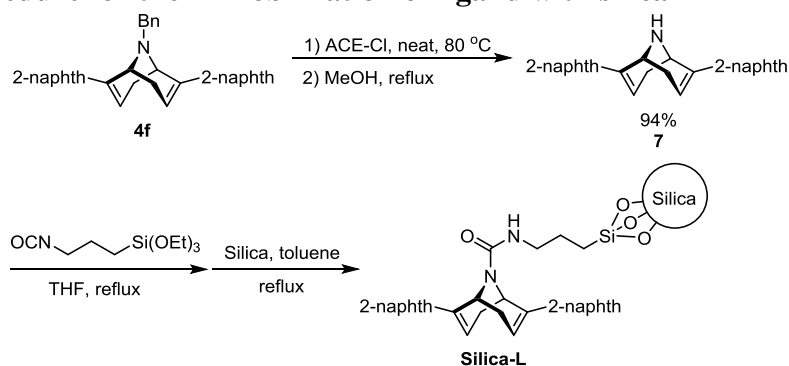

Under nitrogen, a mixture of **4f** (107 mg, 0.23 mmol, 1.0 eq.) and ACE-Cl (0.50 mL, 4.6 mmol 20 eq.) was heated at 80 °C overnight. After 4 mL MeOH was added, the mixture was heated at 70 °C for 4 h. The solvent was dried and concentrated under vacuum. The residue was purified by silica gel column chromatography to afford 81 mg amine **7** (94% yield). **<sup>1</sup>H NMR** (400 MHz, CDCl<sub>3</sub>): δ 7.89 – 7.67 (m, 8H), 7.55 (d, *J* = 8.8 Hz, 2H), 7.50 – 7.39 (m, 4H), 6.20 (dd, *J* = 5.5, 2.3 Hz, 2H), 4.60 (d, *J* = 6.3 Hz, 2H), 2.81 (dd, *J* = 18.6, 6.4 Hz, 2H), 2.20 (dd, *J* = 18.5, 5.5 Hz, 2H). **<sup>13</sup>C NMR** (100 MHz, CDCl<sub>3</sub>): δ 138.88, 136.45, 133.59, 132.84, 128.26, 128.25, 127.66, 126.38, 126.01, 124.49, 124.45, 121.86, 47.27, 30.65. **ESI-MS**: 374.1 [M+H]<sup>+</sup>. **HRMS(ESI)**: *m/z* calcd for C<sub>35</sub>H<sub>30</sub>N [M+H]<sup>+</sup> 374.1903, found 374.1902.

Under nitrogen, a solution of 3-Isocyanatopropyltriethoxysilane (52 mL, 0.21 mmol, 1.05 eq.) in THF was added dropwise to a solution of **7** (75 mg, 0.20 mmol, 1.0 eq.) in THF. The mixture was stirred at rt for 0.5 h, and then it was heated at 70 °C for 2 h. The solvent was dried and concentrated under vacuum to get the crude siloxane. And then it was added to a suspension of 1g silica (100-200 mesh) in 10 mL of toluene and the resulting mixture was refluxed for 2 h. The resulting **silica-L** was washed with toluene, dried under reduced pressure, and stored under an inert atmosphere. **Elemental Analysis**: C 4.90%, N 0.32%. **FT-IR(KBr)**: ν(C=O) 1632 cm<sup>-1</sup>, ν(N-H) 1538 cm<sup>-1</sup>.

## 6. The rhodium-catalyzed arylation of *N*-tosylarylimines with silica-L

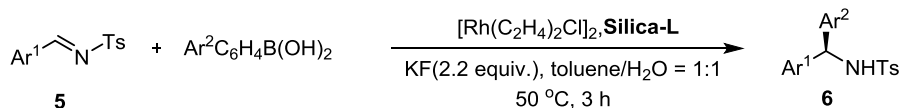

Under nitrogen, to a Schlenk flask charged with *N*-tosylarylimine **5** (0.20 mmol, 1.0 eq.), arylboronic acid (0.40 mmol, 2.0 eq.), [RhCl(C<sub>2</sub>H<sub>4</sub>)<sub>2</sub>]<sub>2</sub> (3.9 mg, 0.010 mmol, 5 mol%), immobilized ligand **Silica-L** (102 mg, 0.012 mmol, 6 mol%, 0.114 mmol/g), KF (26 mg, 0.44 mmol, 2.2 eq.) was added 1.0 mL of toluene and 1.0 mL of water. The mixture was heated to 50 °C and stirred for 3 h. The mixture was filtered under vacuum and washed with ethanol. The solvent of filtrate was removed and the residue was purified by silica gel column chromatography to afford the desired diarylmethylamine product **6**. The filter cake was dried under vacuum and used as recovered catalyst for the next run reaction.

**(S)-N-((4-methoxyphenyl)(phenyl)methyl)-4-methylbenzenesulfonamide (6a)**

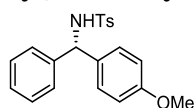

**HPLC:** Chiralcel OD-H Column; detected at 214 nm; *n*-hexane / *i*-propanol = 70/30; flow = 0.7 mL/min; Retention time: 8.45 min [(*S*)-**6a**], 10.70 min [(*R*)-**6a**].

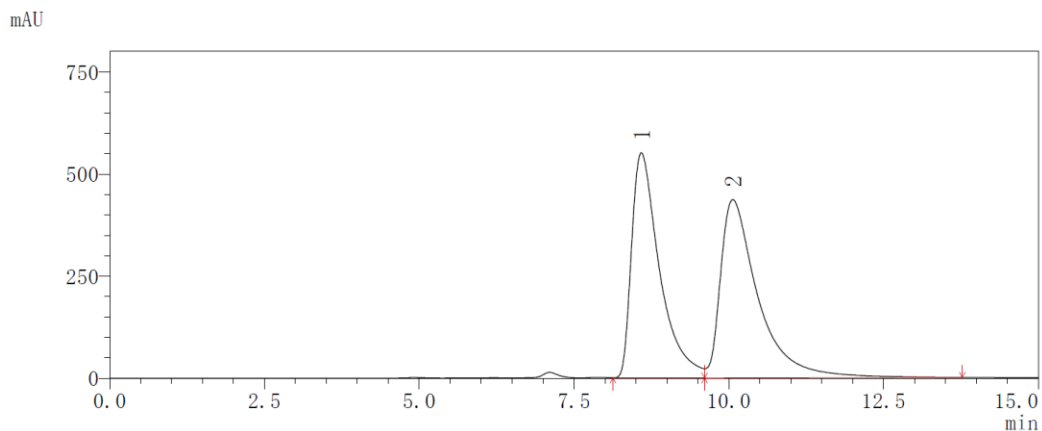

PDA Ch1 254nm

| Number | Ret. Time | Area     | Area% |
|--------|-----------|----------|-------|
| 1      | 8.587     | 17311320 | 48.42 |
| 2      | 10.064    | 18440306 | 51.58 |

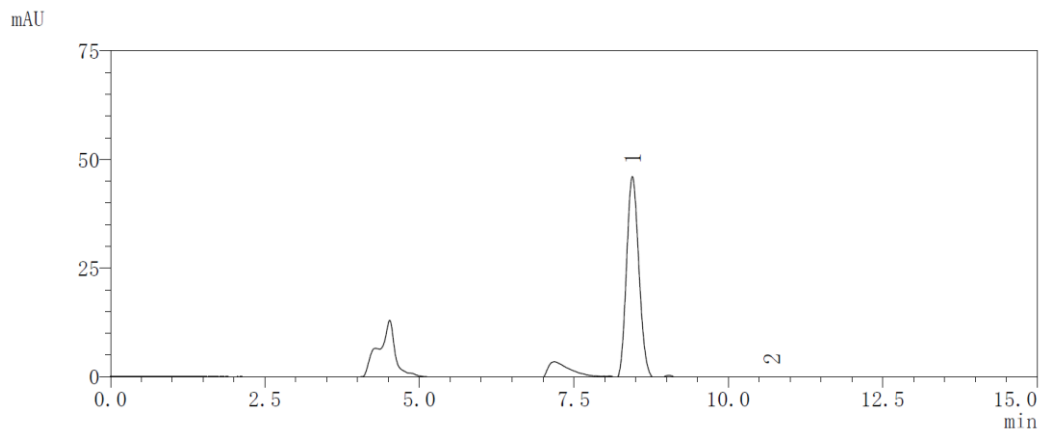

PDA Ch1 214nm

| Number | Ret. Time | Area   | Area% |
|--------|-----------|--------|-------|
| 1      | 8.447     | 678045 | 99.35 |
| 2      | 10.701    | 4442   | 0.65  |

**(S)-4-methyl-N-(phenyl(p-tolyl)methyl)benzenesulfonamide (6b)**

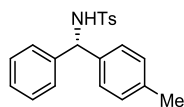

**HPLC:** Chiralpak OJ-3 Column; detected at 224 nm; *n*-hexane / *i*-propanol = 70/30; flow = 0.5 mL/min; Retention time: 9.5 min [(*R*)-**6b**], 11.2 min [(*S*)-**6b**].

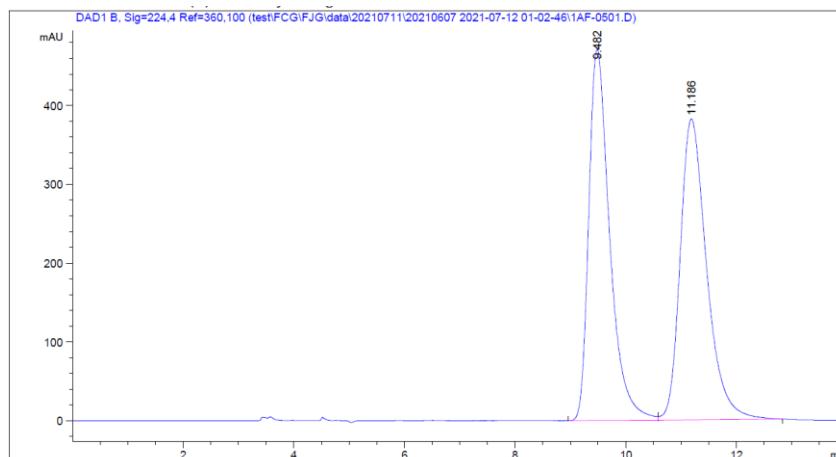

| Peak # | RetTime [min] | Type | Width [min] | Area [mAU*s] | Height [mAU] | Area %  |
|--------|---------------|------|-------------|--------------|--------------|---------|
| 1      | 9.482         | BV   | 0.3890      | 1.23749e4    | 471.11304    | 49.4502 |
| 2      | 11.186        | VB   | 0.4845      | 1.26501e4    | 381.82816    | 50.5498 |

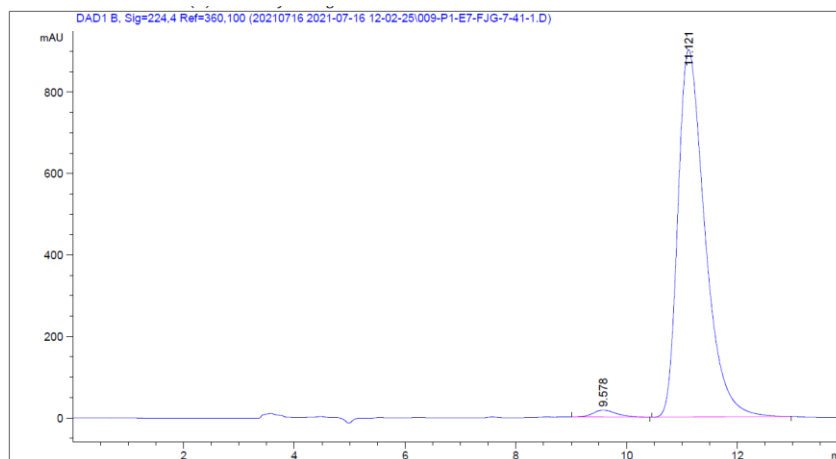

| Peak # | RetTime [min] | Type | Width [min] | Area [mAU*s] | Height [mAU] | Area %  |
|--------|---------------|------|-------------|--------------|--------------|---------|
| 1      | 9.578         | BB   | 0.3451      | 499.93915    | 16.99772     | 1.6095  |
| 2      | 11.121        | BB   | 0.4970      | 3.05624e4    | 901.52655    | 98.3905 |

**(S)-N-((4-methoxyphenyl)(4-(trifluoromethyl)phenyl)methyl)-4-methylbenzenesulfonamide**

**(6d)**

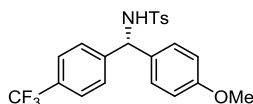

**HPLC:** Chiralpak IB-3 Column; detected at 214 nm; *n*-hexane / *i*-propanol = 70/30; flow = 0.5 mL/min; Retention time: 9.5 min [(*S*)-**6d**], 11.5 min [(*R*)-**6d**].

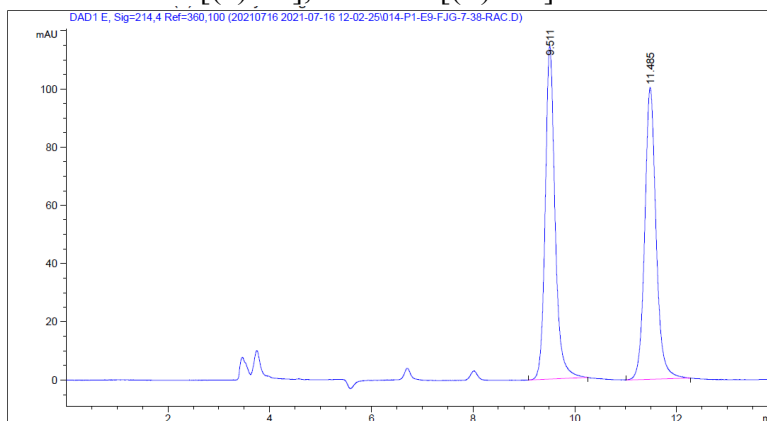

| Peak # | RetTime [min] | Type | Width [min] | Area [mAU*s] | Height [mAU] | Area %  |
|--------|---------------|------|-------------|--------------|--------------|---------|
| 1      | 9.511         | BB   | 0.2019      | 1535.12573   | 114.48547    | 49.7276 |
| 2      | 11.485        | BB   | 0.2281      | 1551.94385   | 100.24756    | 50.2724 |

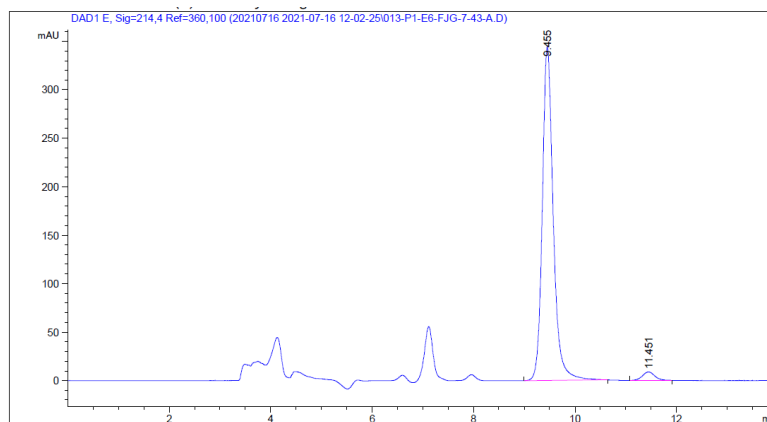

| Peak # | RetTime [min] | Type | Width [min] | Area [mAU*s] | Height [mAU] | Area %  |
|--------|---------------|------|-------------|--------------|--------------|---------|
| 1      | 9.455         | BB   | 0.2252      | 5150.80957   | 344.02362    | 97.2670 |
| 2      | 11.451        | BB   | 0.2023      | 144.72511    | 8.75809      | 2.7330  |

## 7. References

- (1) V. Bieliūnas, D. Račkauskaitė, E. Orentas and S. Stončius, Synthesis, Enantiomer Separation, and Absolute Configuration of 2,6-Oxygenated 9- Azabicyclo[3.3.1]nonanes. *J. Org. Chem.* 2013, **78**, 5339-5348.
- (2) T. Hayashi and M. Ishigedani, Rhodium-Catalyzed Asymmetric Arylation of Imines with Organostannanes. Asymmetric Synthesis of Diarylmethylamines. *J. Am. Chem. Soc.* 2000, **122**, 976-977.
- (3) Tokunaga, N.; Otomaru, Y.; Okamoto, K.; Ueyama, K.; Shintani R.; Hayashi, T. C<sub>2</sub>-Symmetric Bicyclo[2.2.2]Octadienes as Chiral Ligands: Their High Performance in Rhodium-Catalyzed Asymmetric Arylation of N-Tosylarylimines. *J. Am. Chem. Soc.* 2004, **126**, 13584-13585.
- (4) Z.-Q. Wang, C.-G. Feng, M.-H. Xu, and G.-Q. Lin, Design of C<sub>2</sub>-Symmetric Tetrahydropentalenes as New Chiral Diene Ligands for Highly Enantioselective Rh-Catalyzed Arylation of N-Tosylarylimines with Arylboronic Acids. *J. Am. Chem. Soc.* 2007, **129**, 5336-5337.
- (5) C. Shao, H.-J. Yu, N.-Y. Wu, C.-G. Feng and G.-Q. Lin, C<sub>1</sub>-Symmetric Dicyclopentadienes as New Chiral Diene Ligands for Asymmetric Rhodium-Catalyzed Arylation of N-Tosylarylimines. *Org. Lett.* 2010, **17**, 3820-3823.
- (6) F. Xue, Q. Liu, Y. Zhu, Y. Qing and B. Wan, Chiral Benzene Backbone-Based Sulfoxide-Olefin Ligands for Highly Enantioselective Rh-Catalyzed Addition of Arylboronic Acids to N-Tosylarylimines. *RSC Adv.* 2019, **9**, 25377-25381.

### 8. $^1\text{H}$ , $^{13}\text{C}$ and $^{19}\text{F}$ NMR spectra of compounds 3, 4, 6 and 7

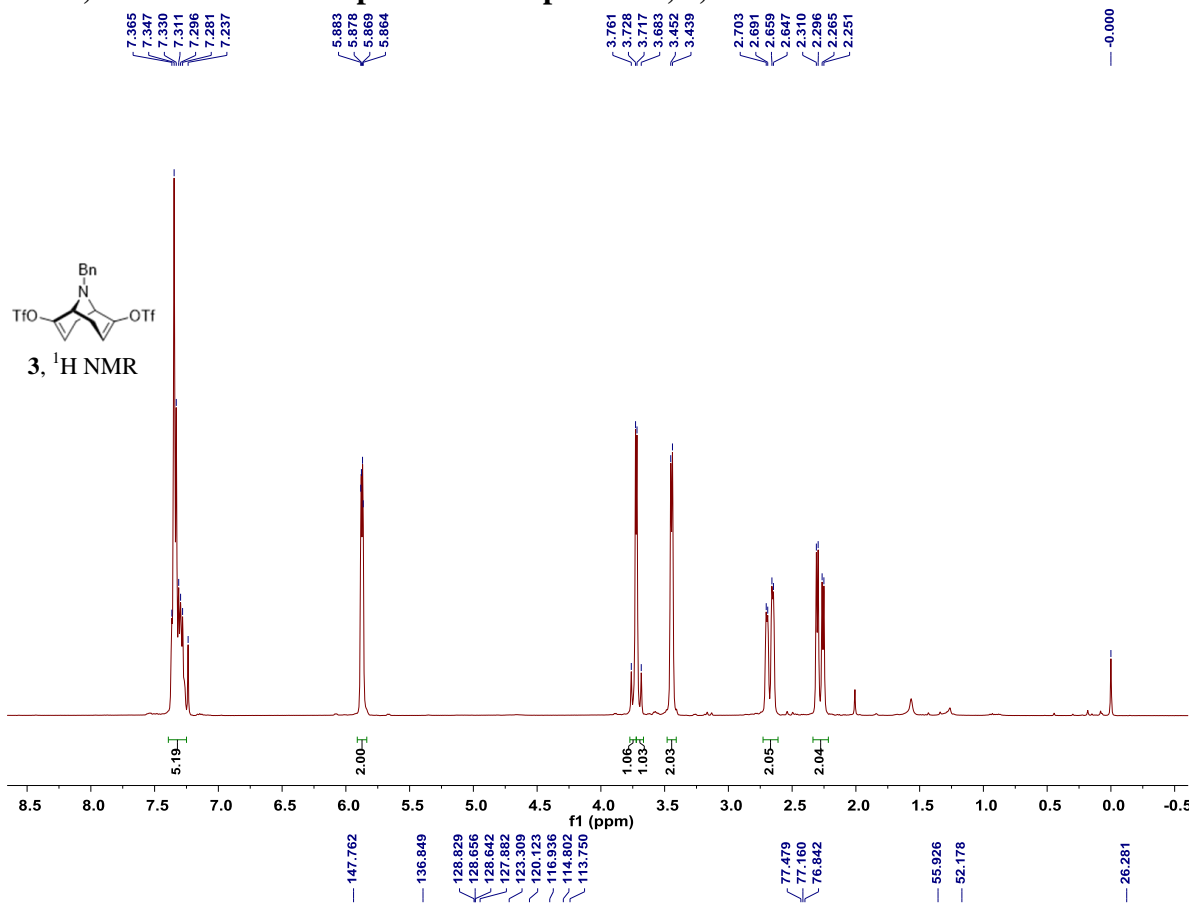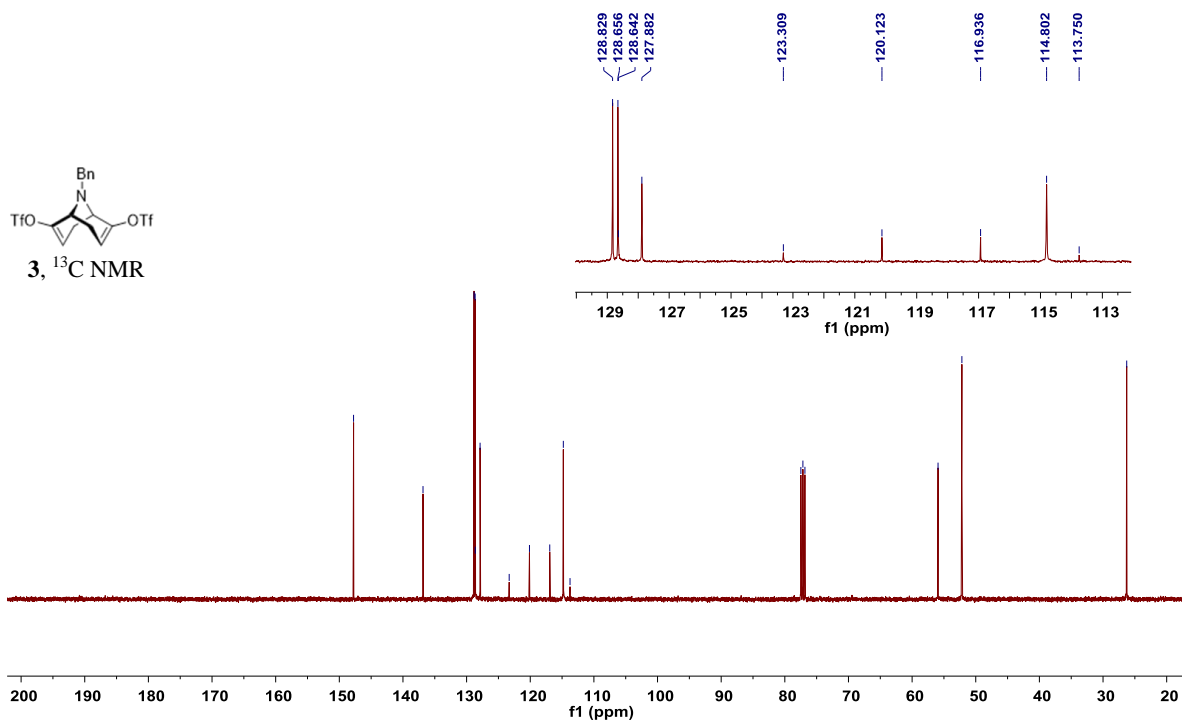

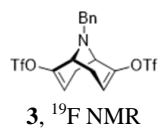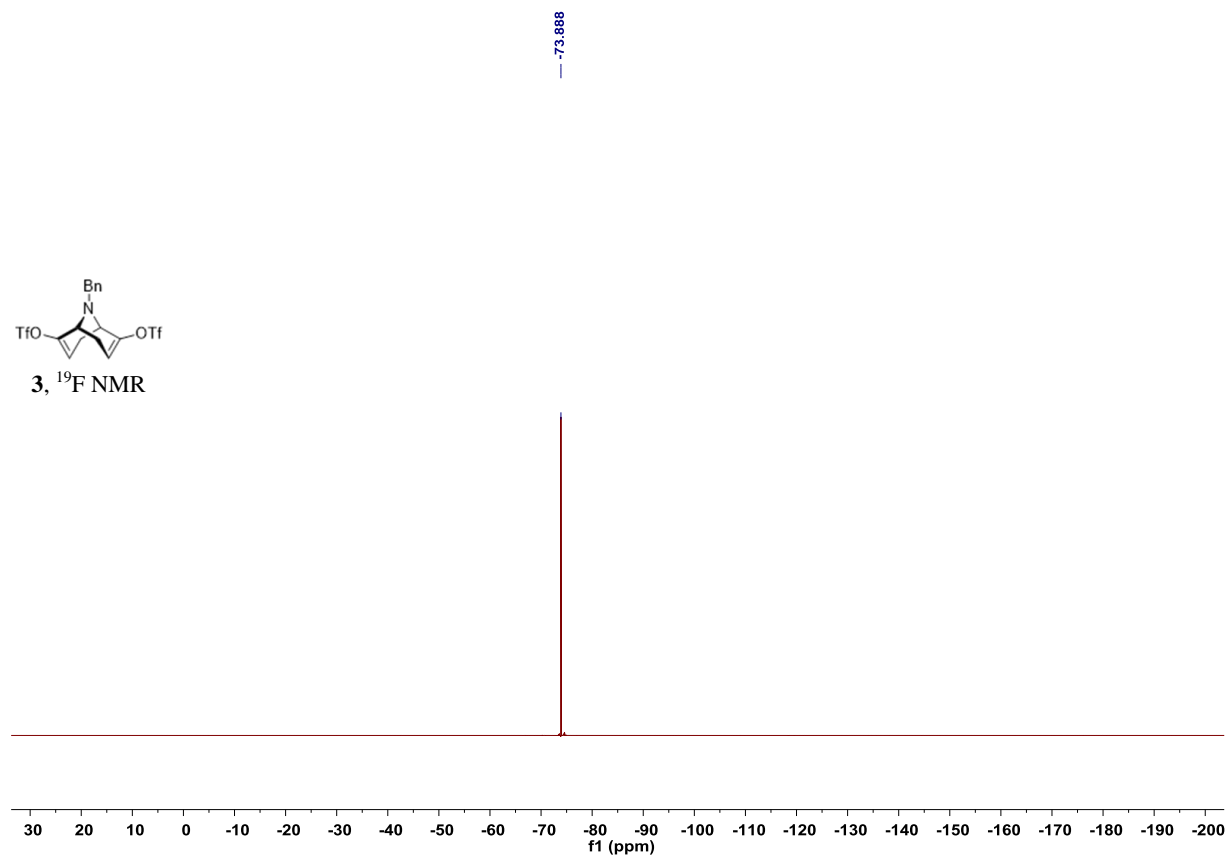

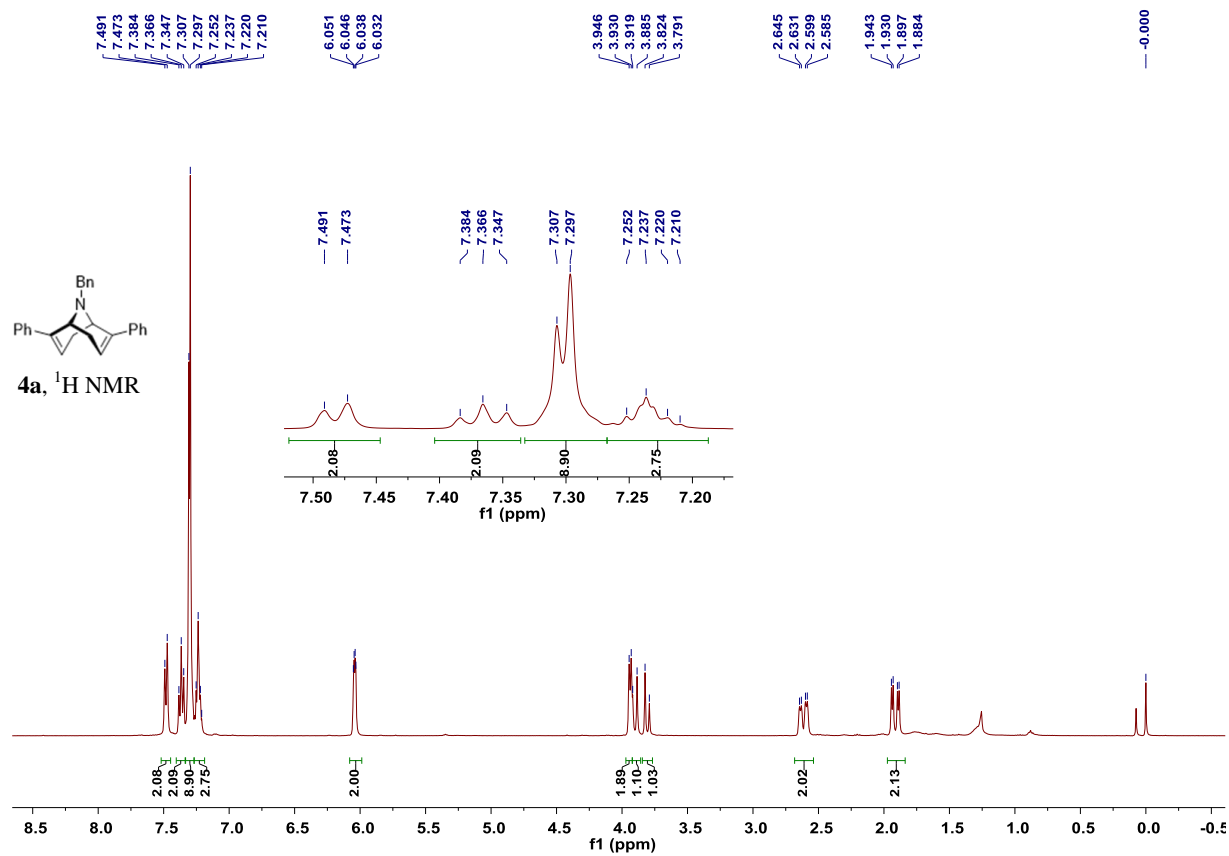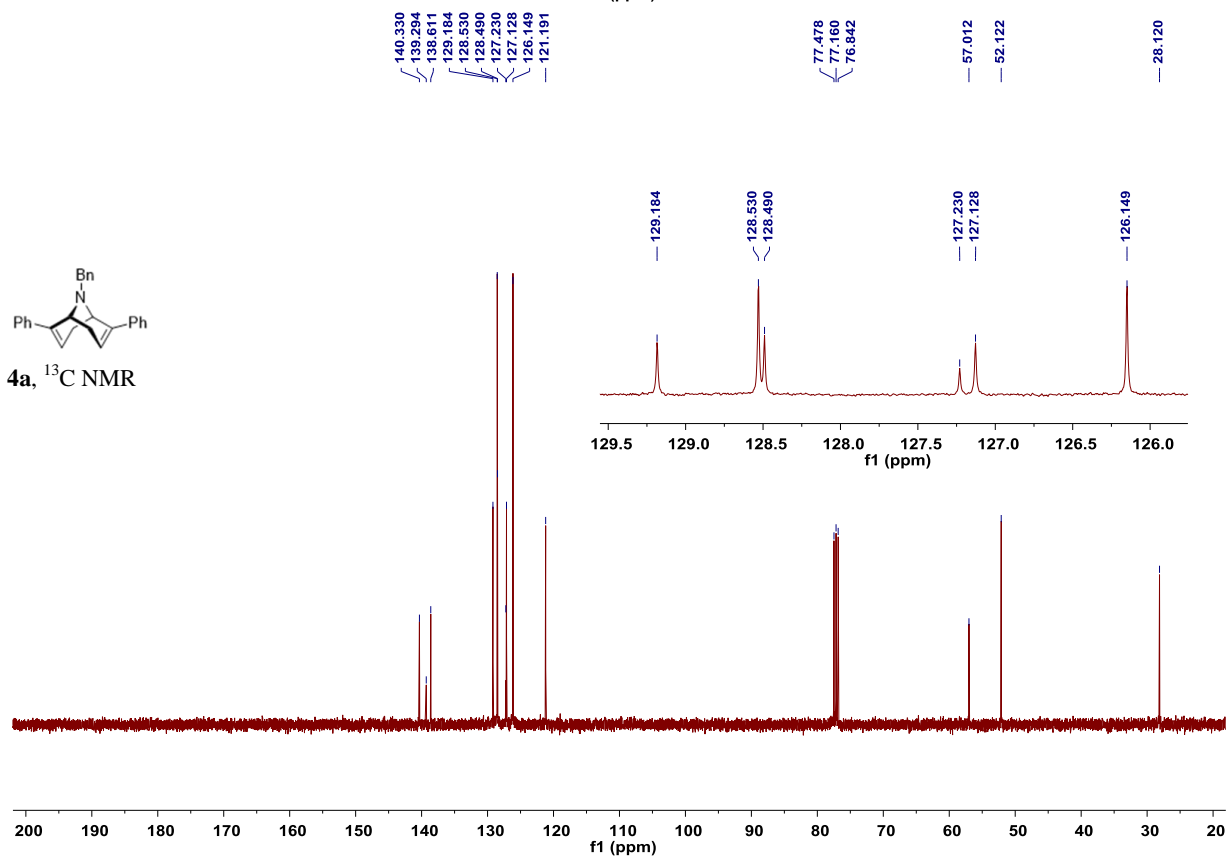



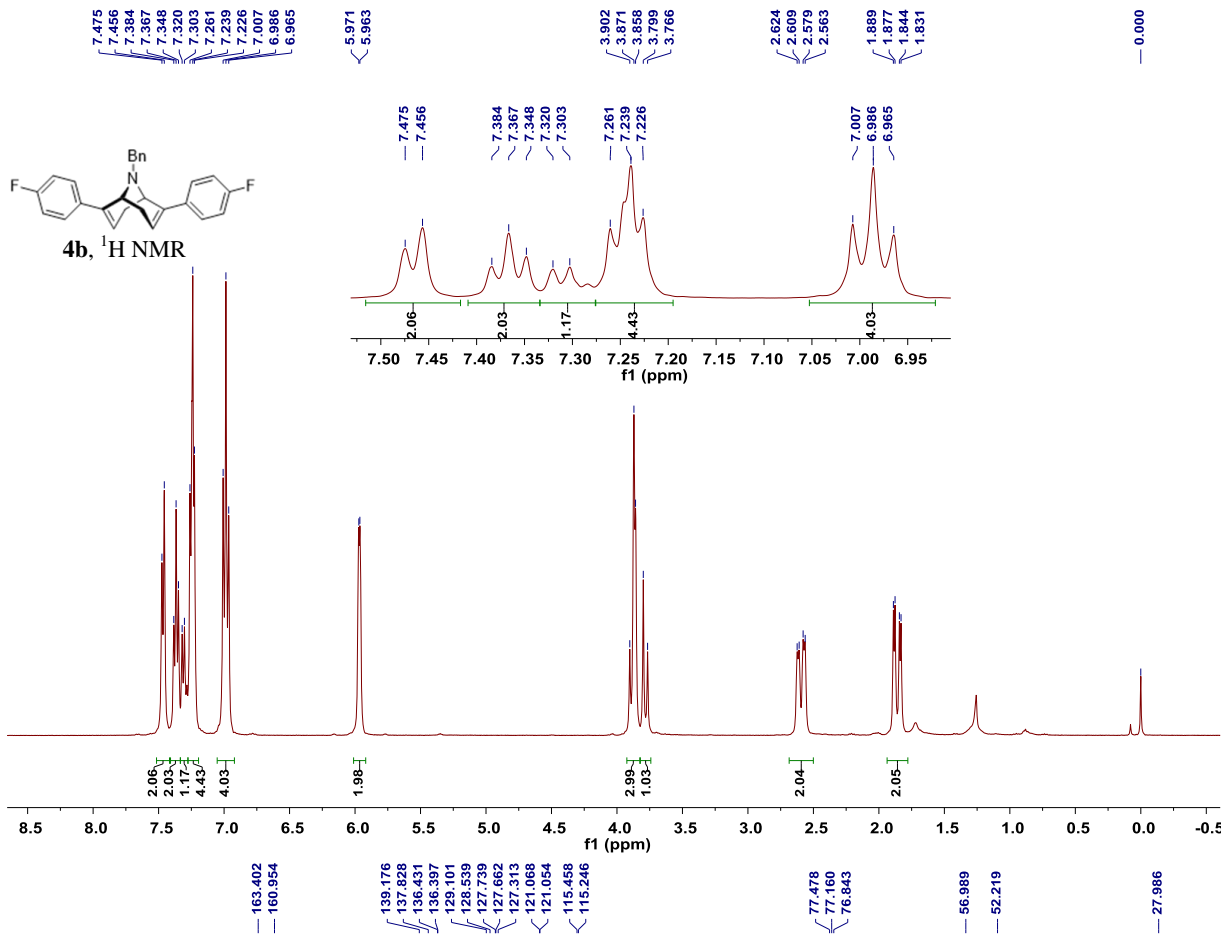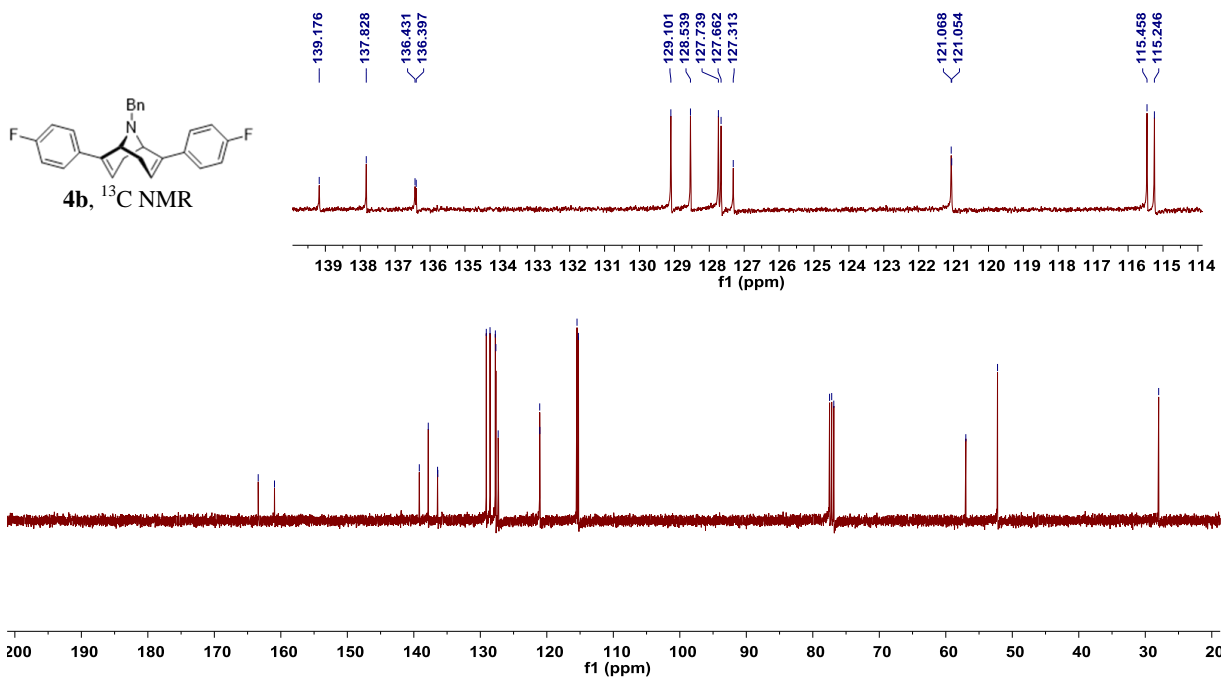

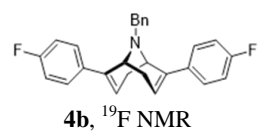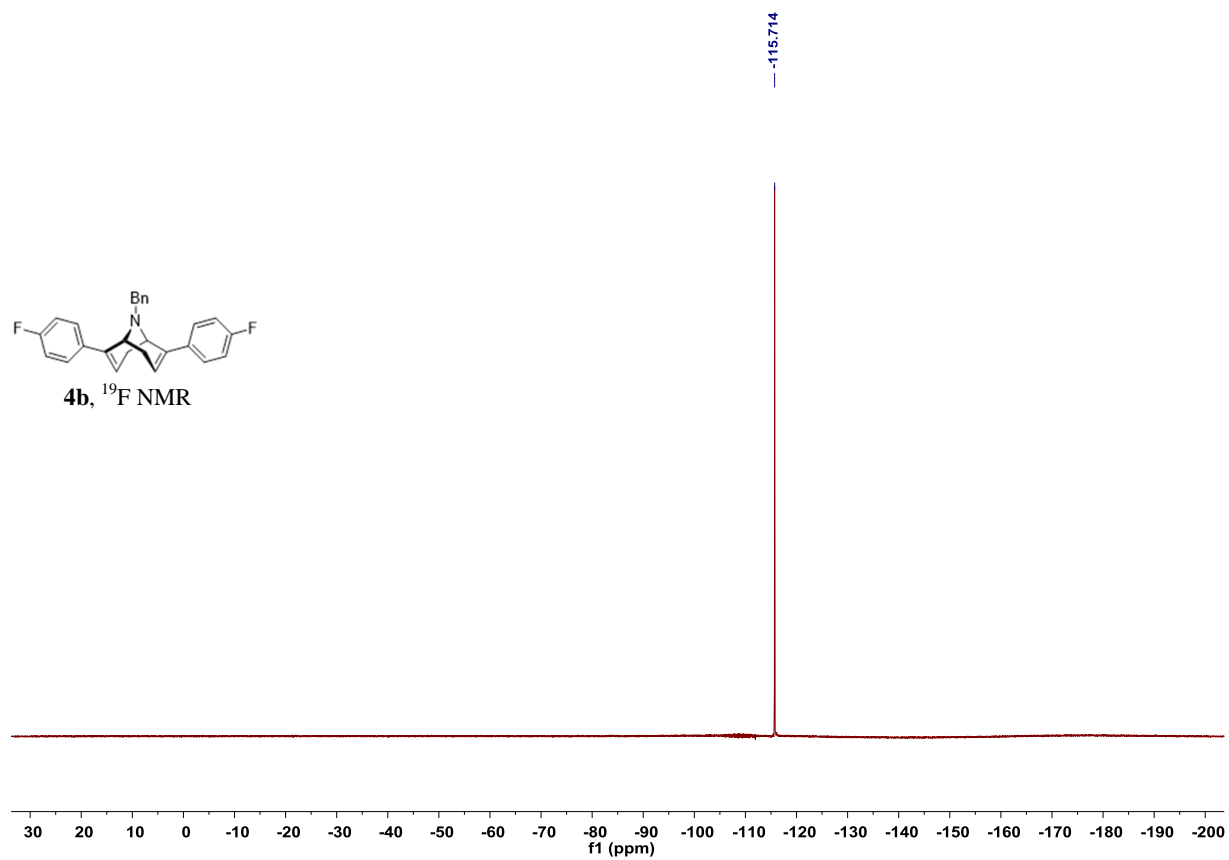

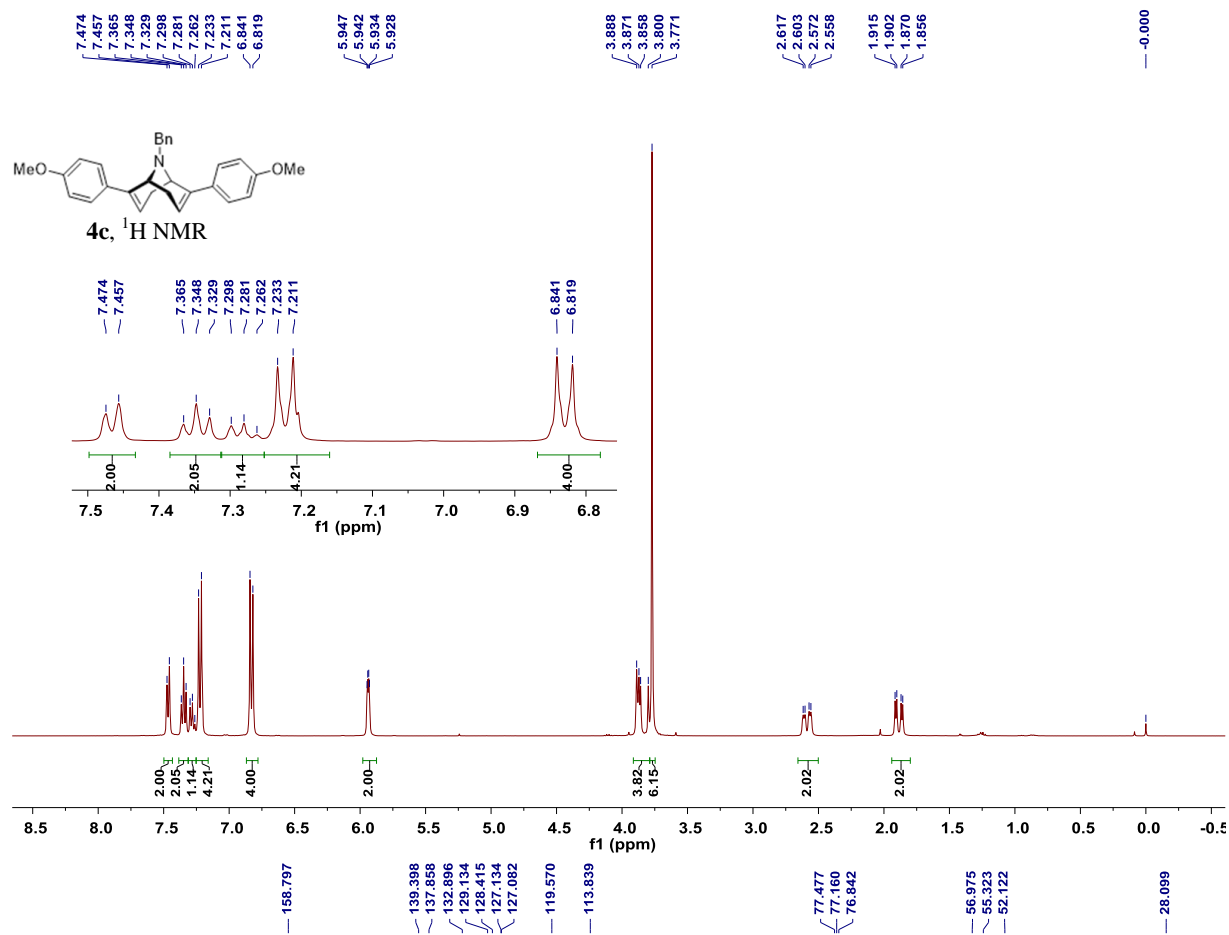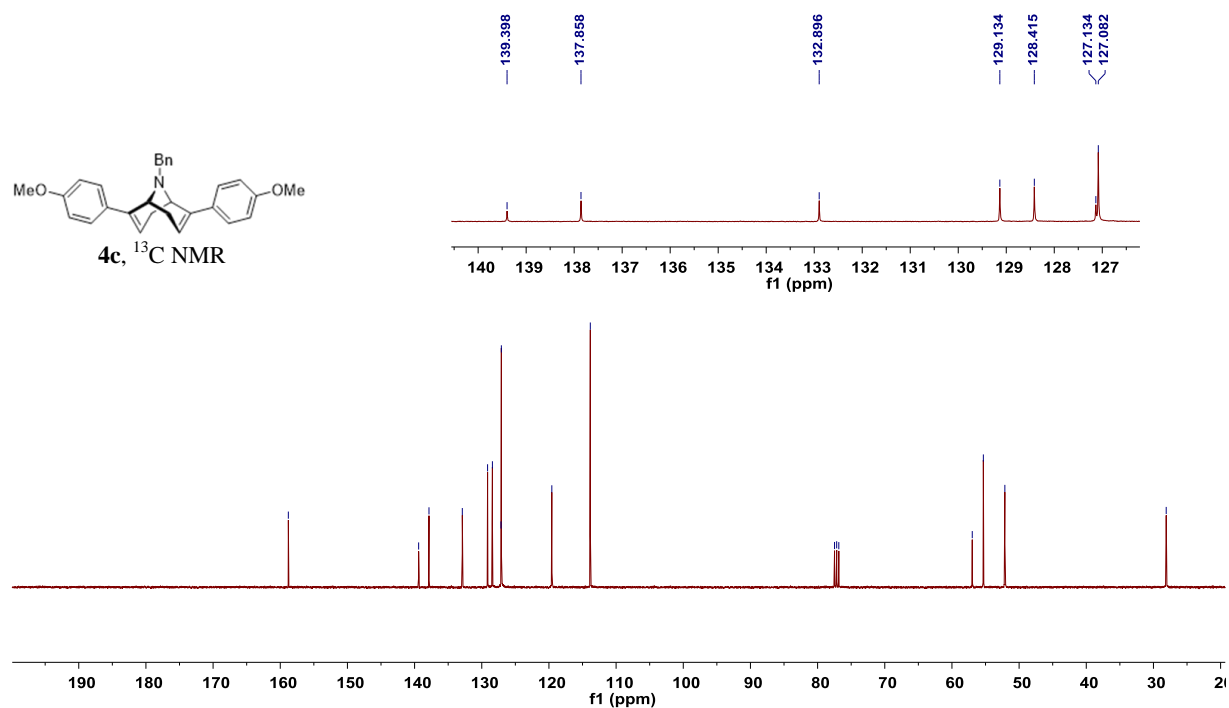

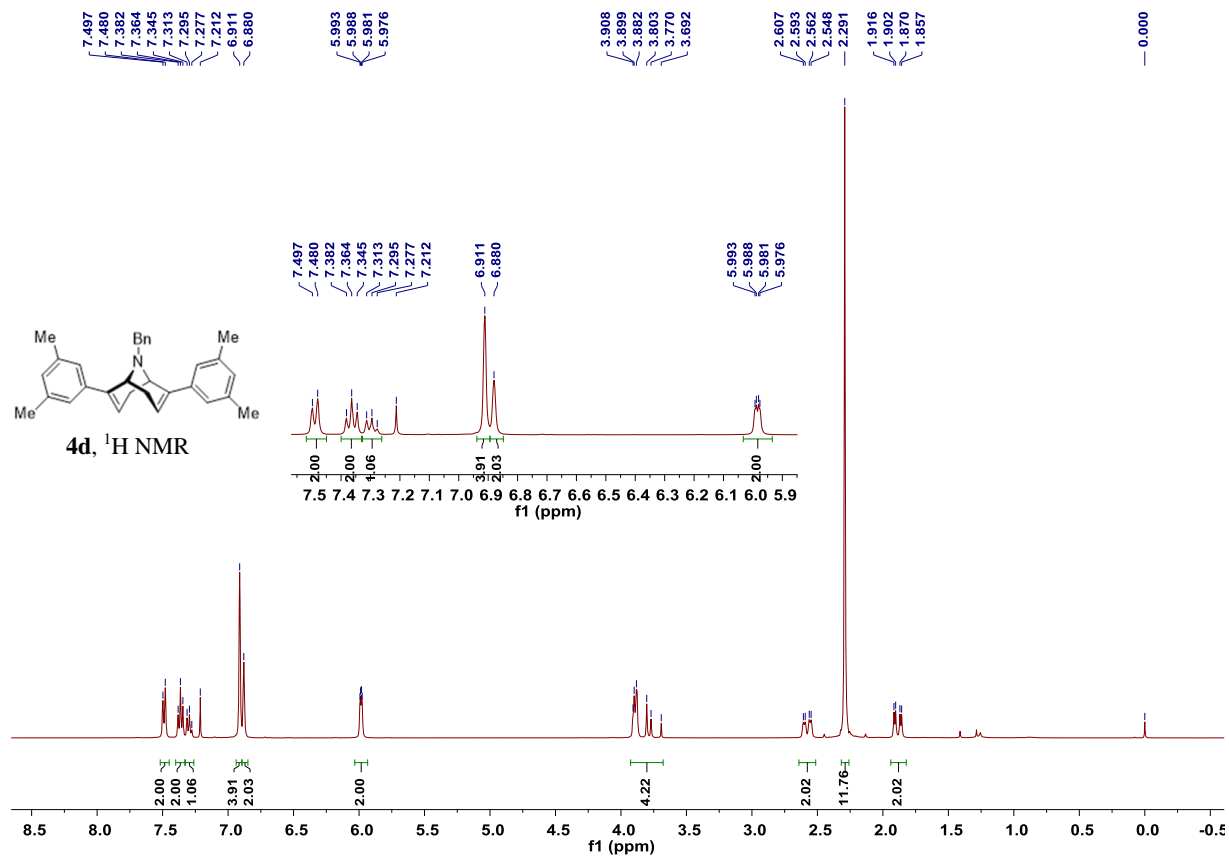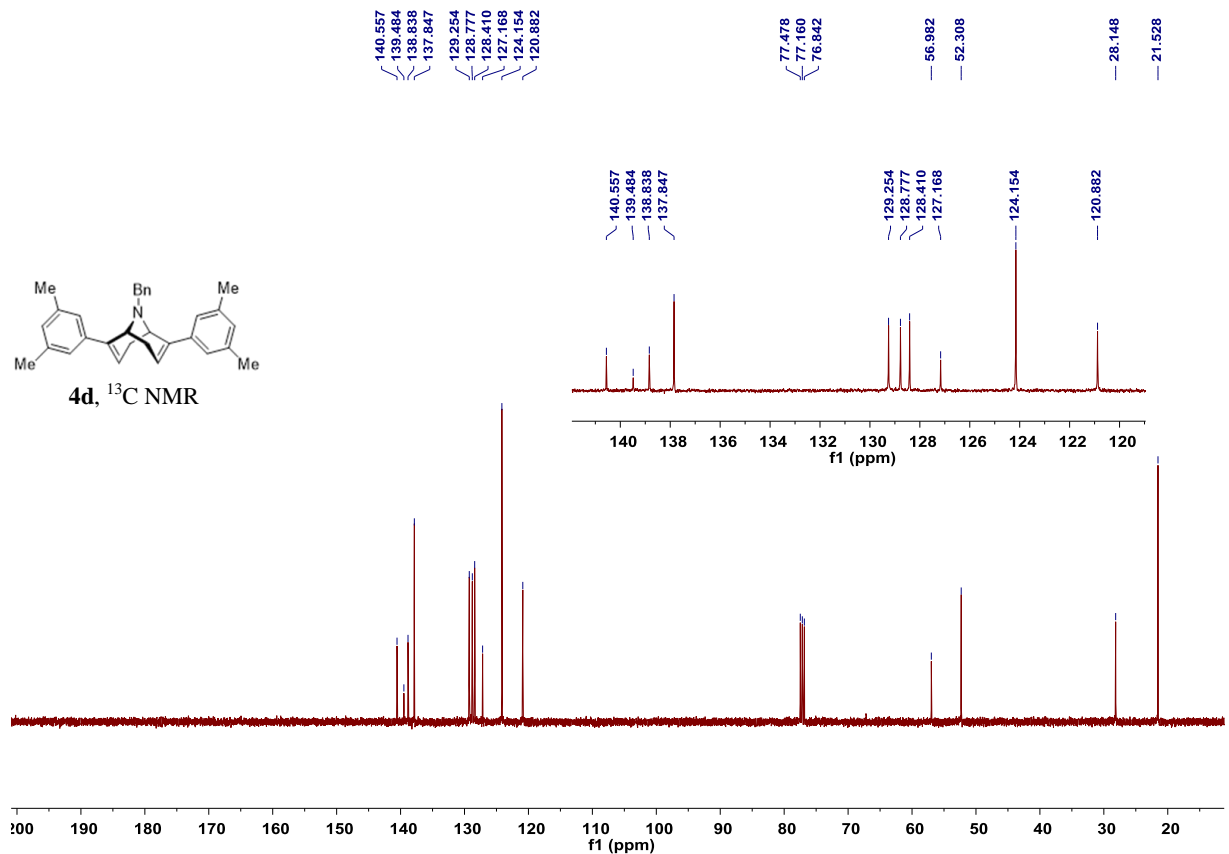

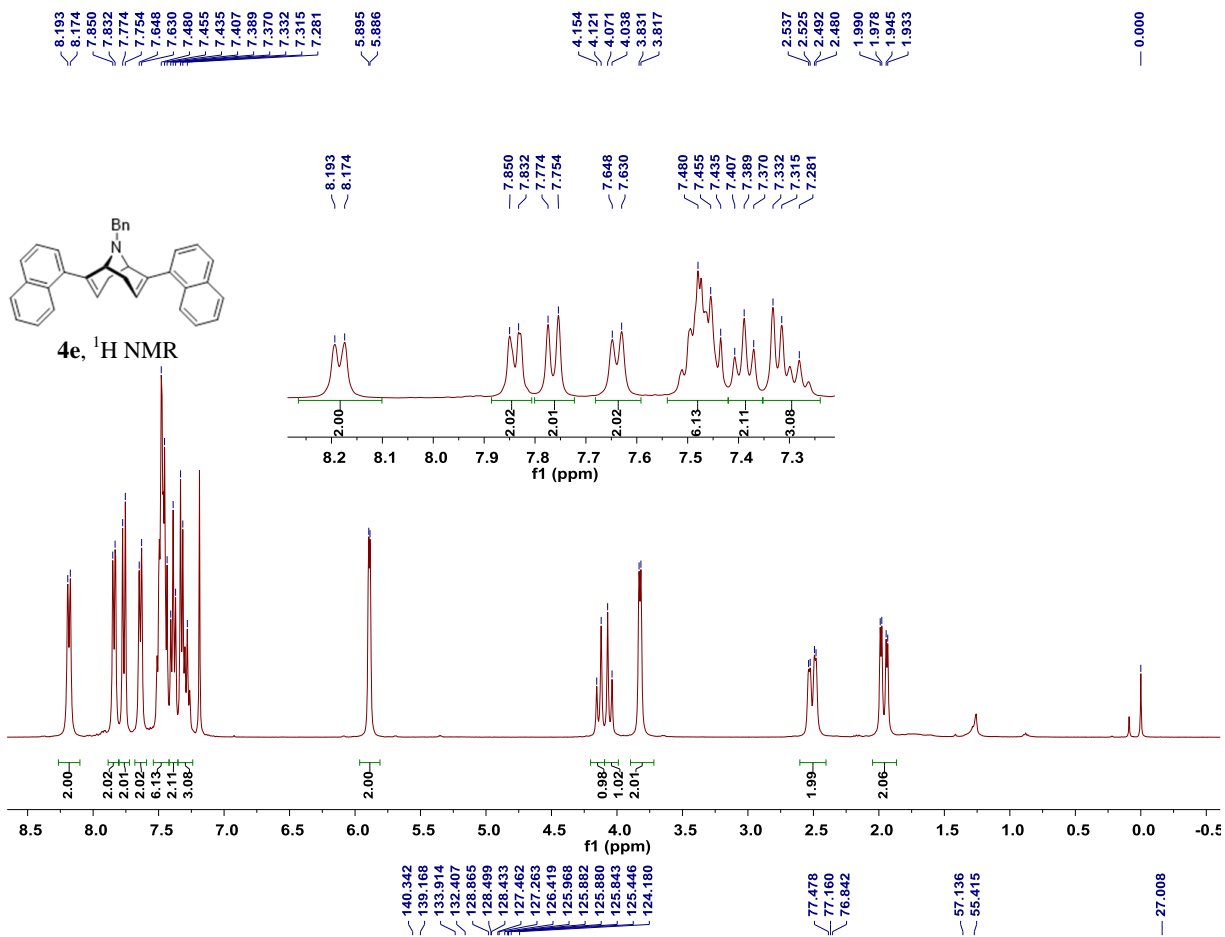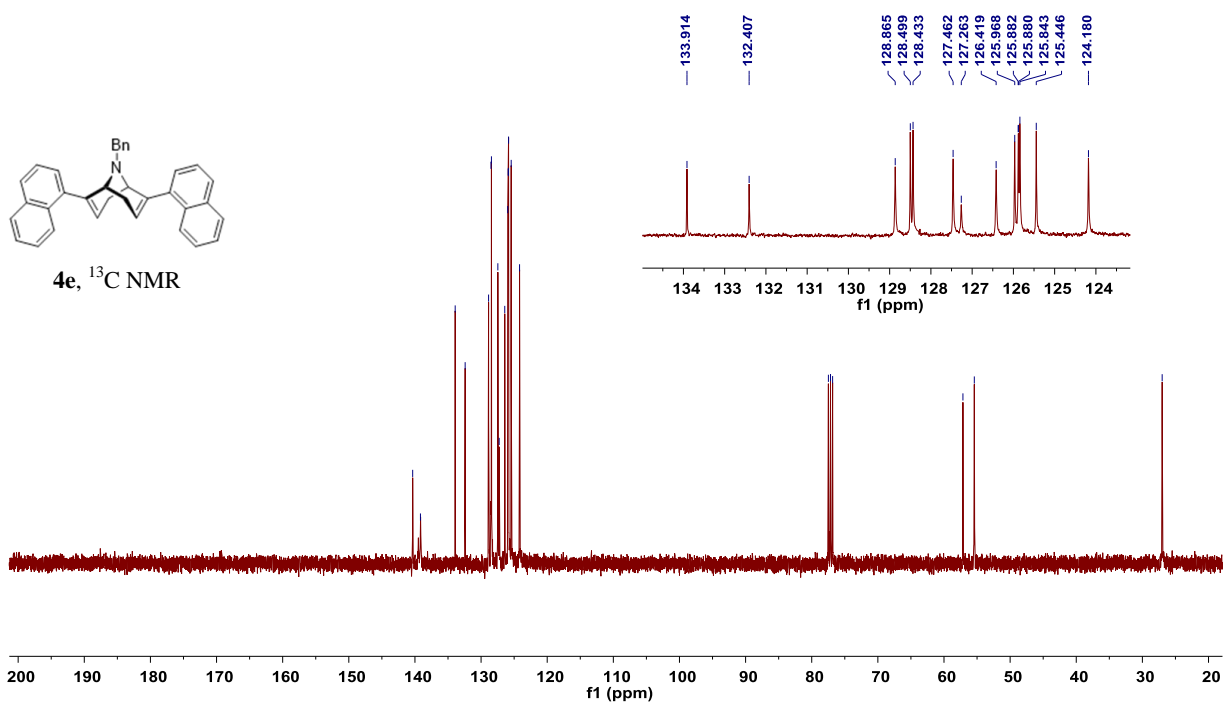

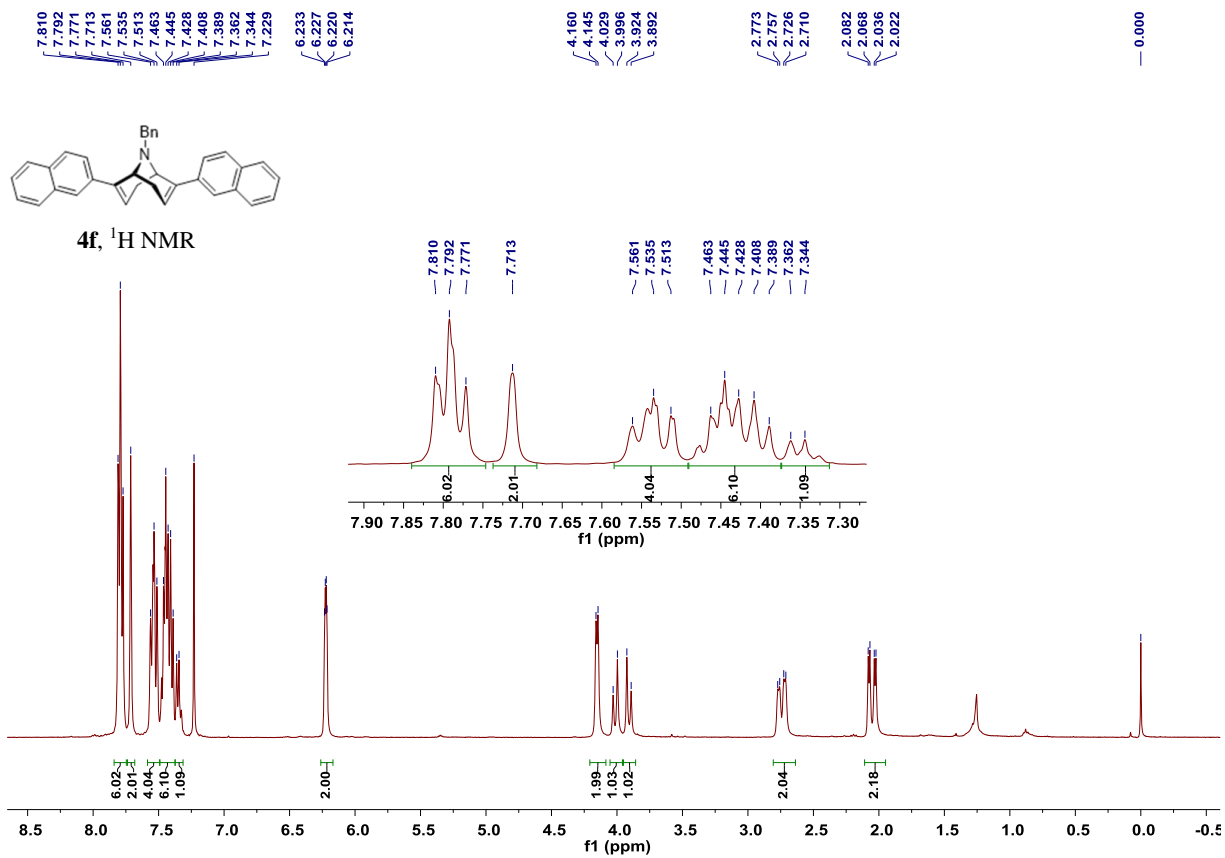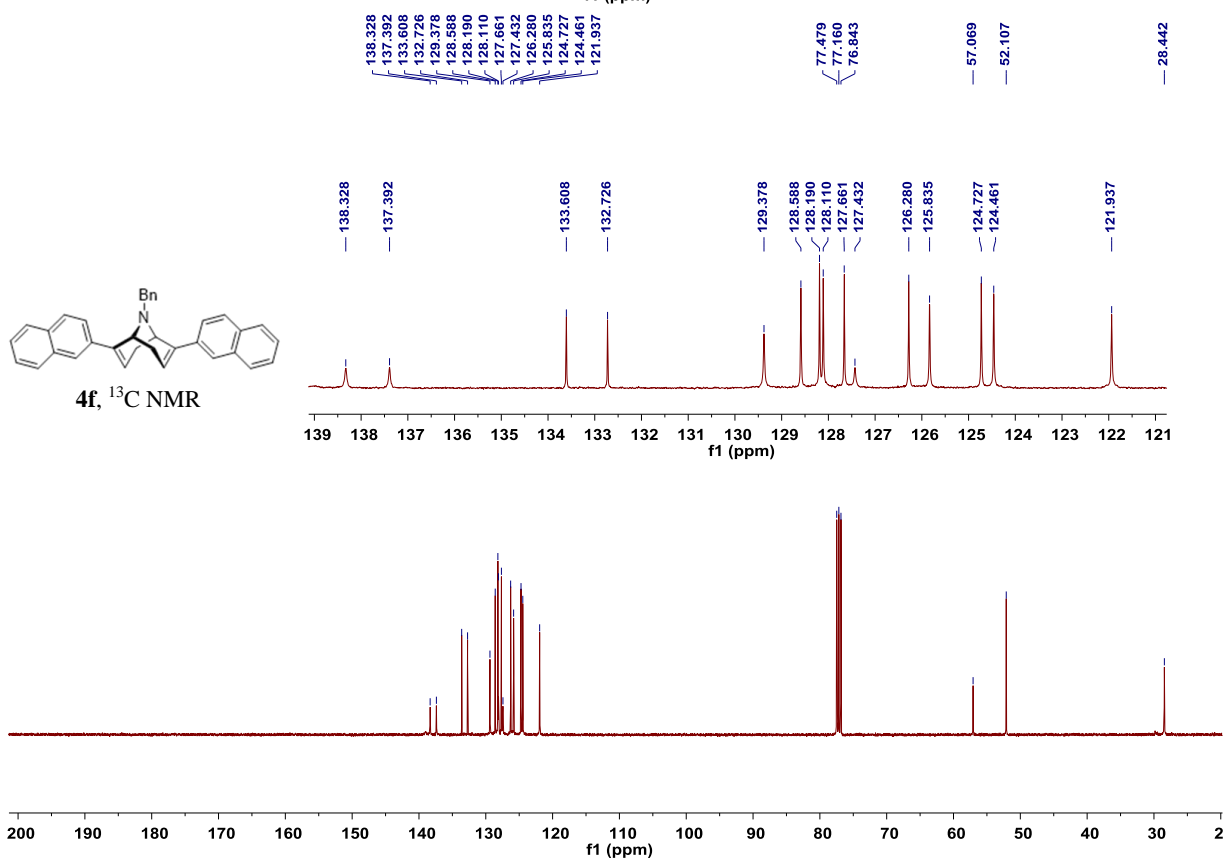

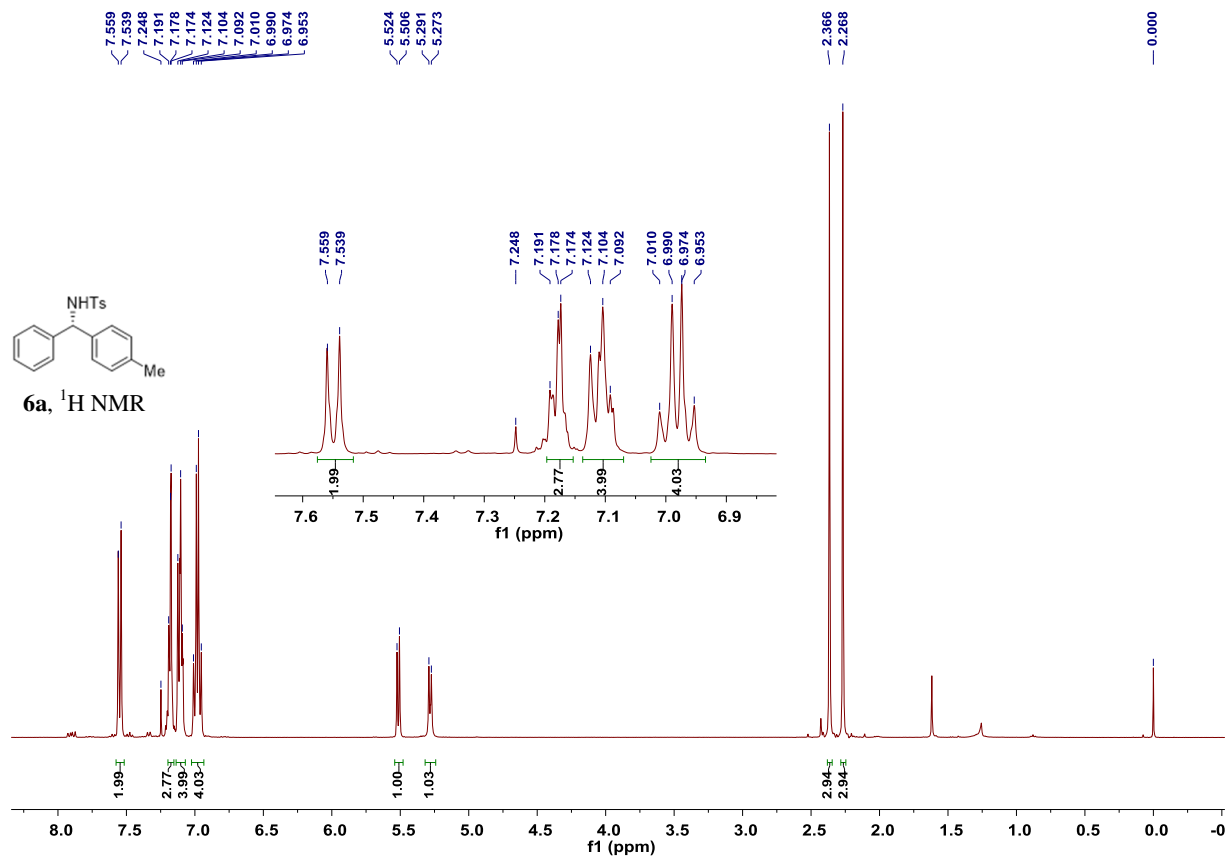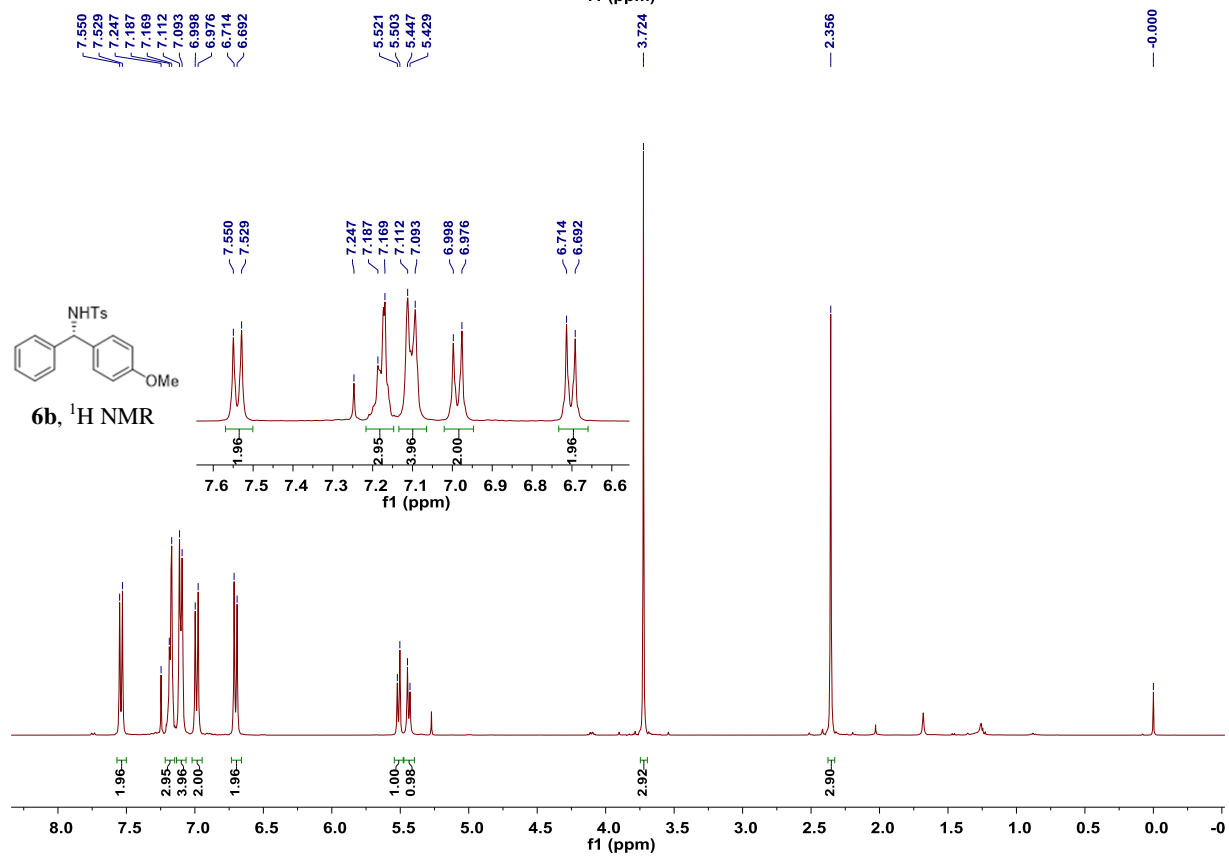

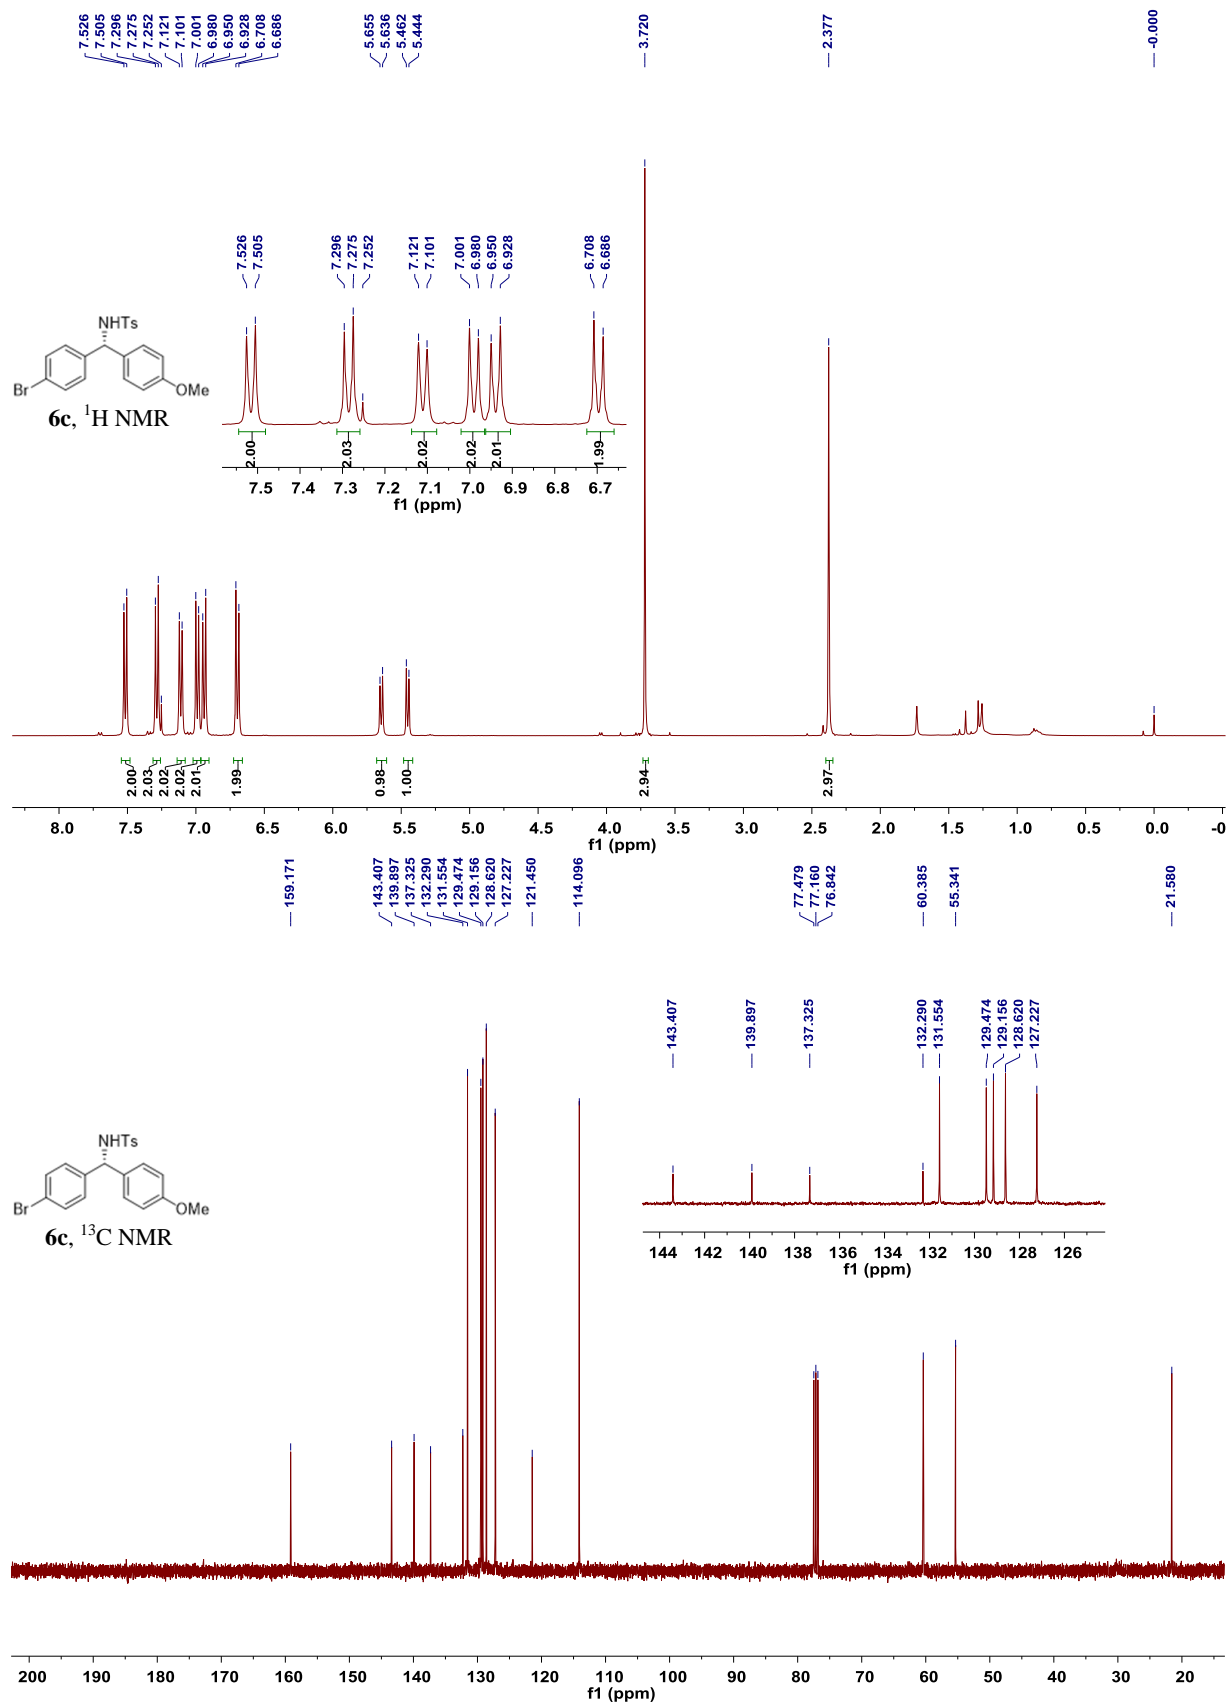



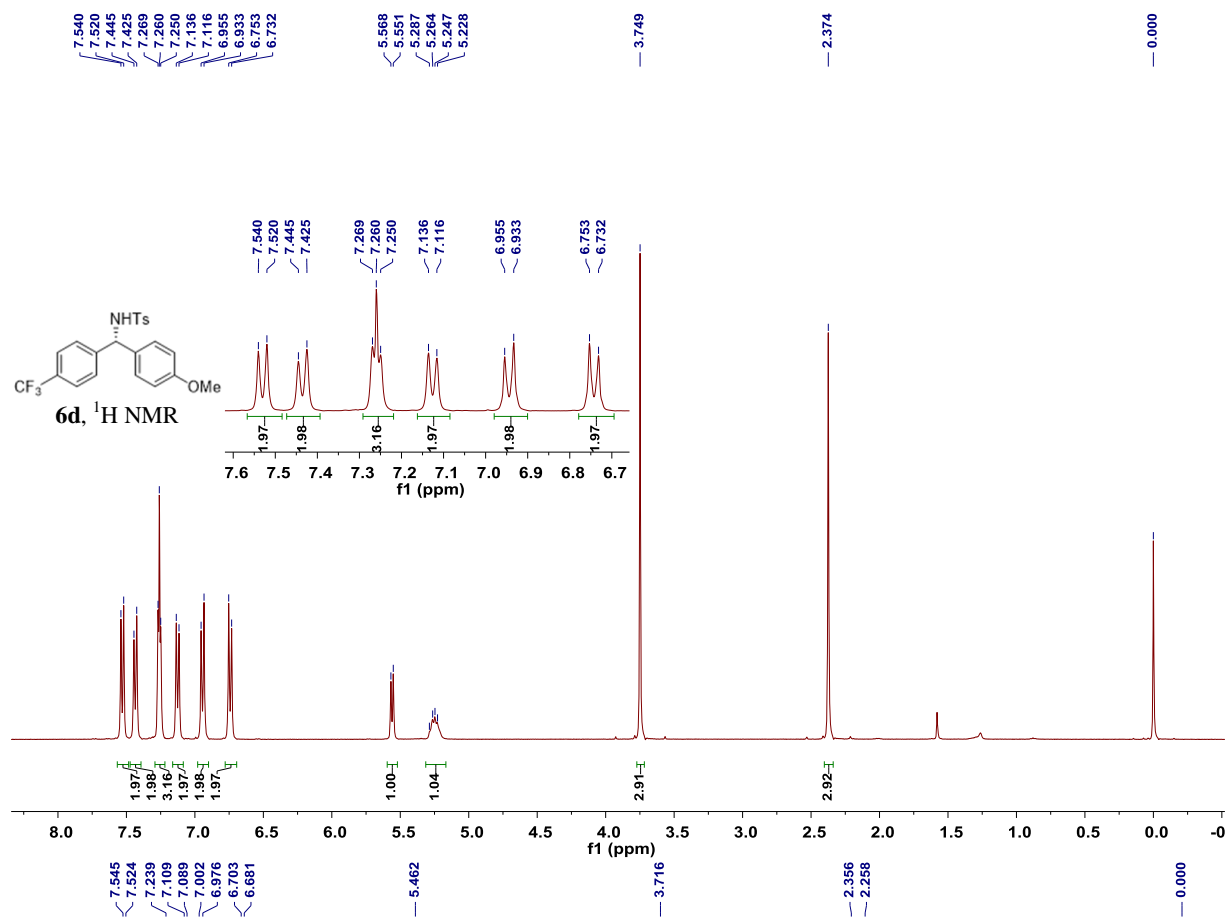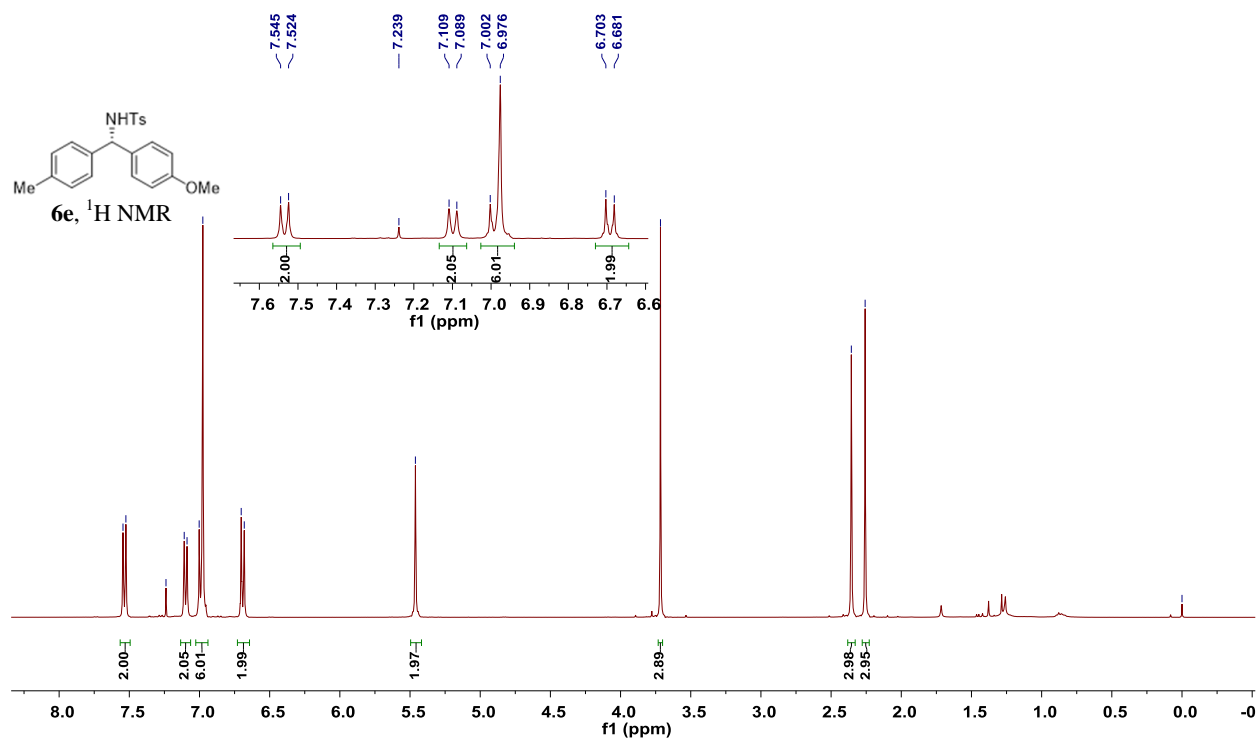

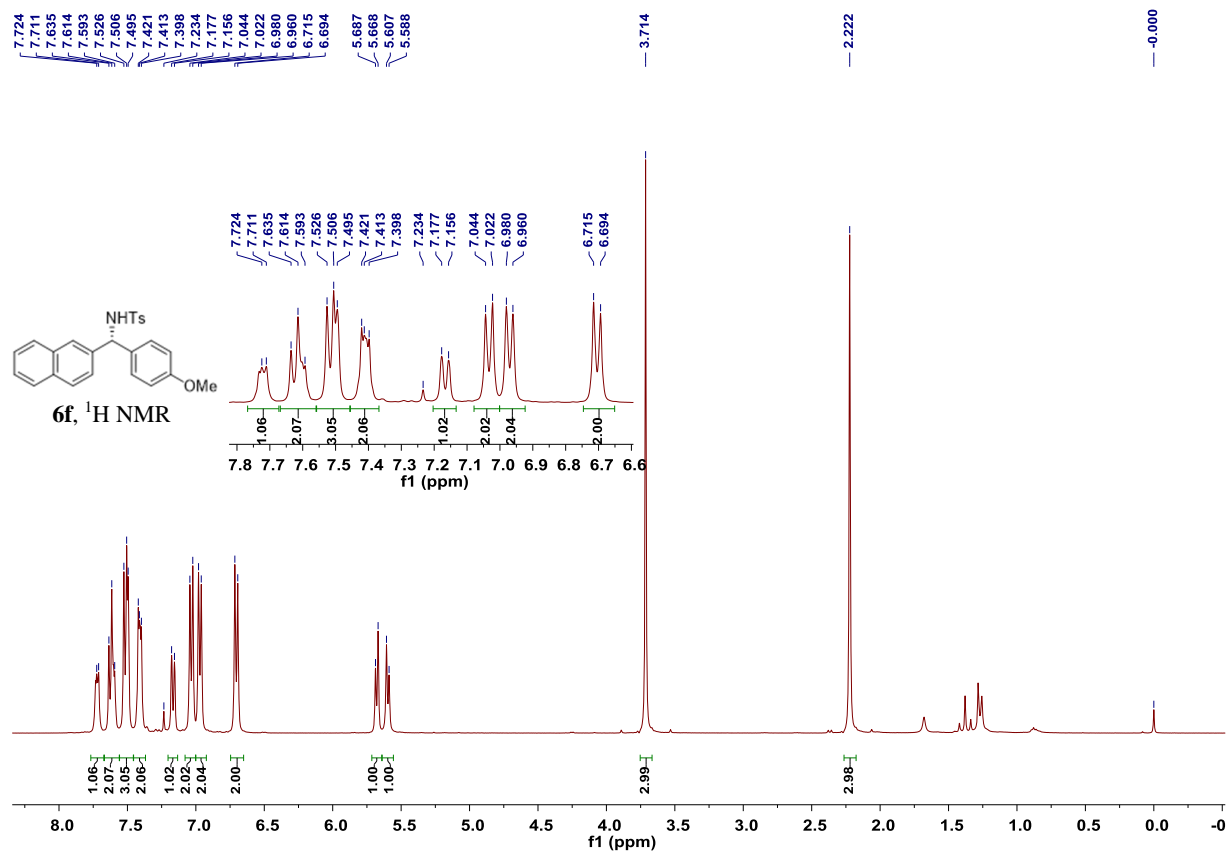

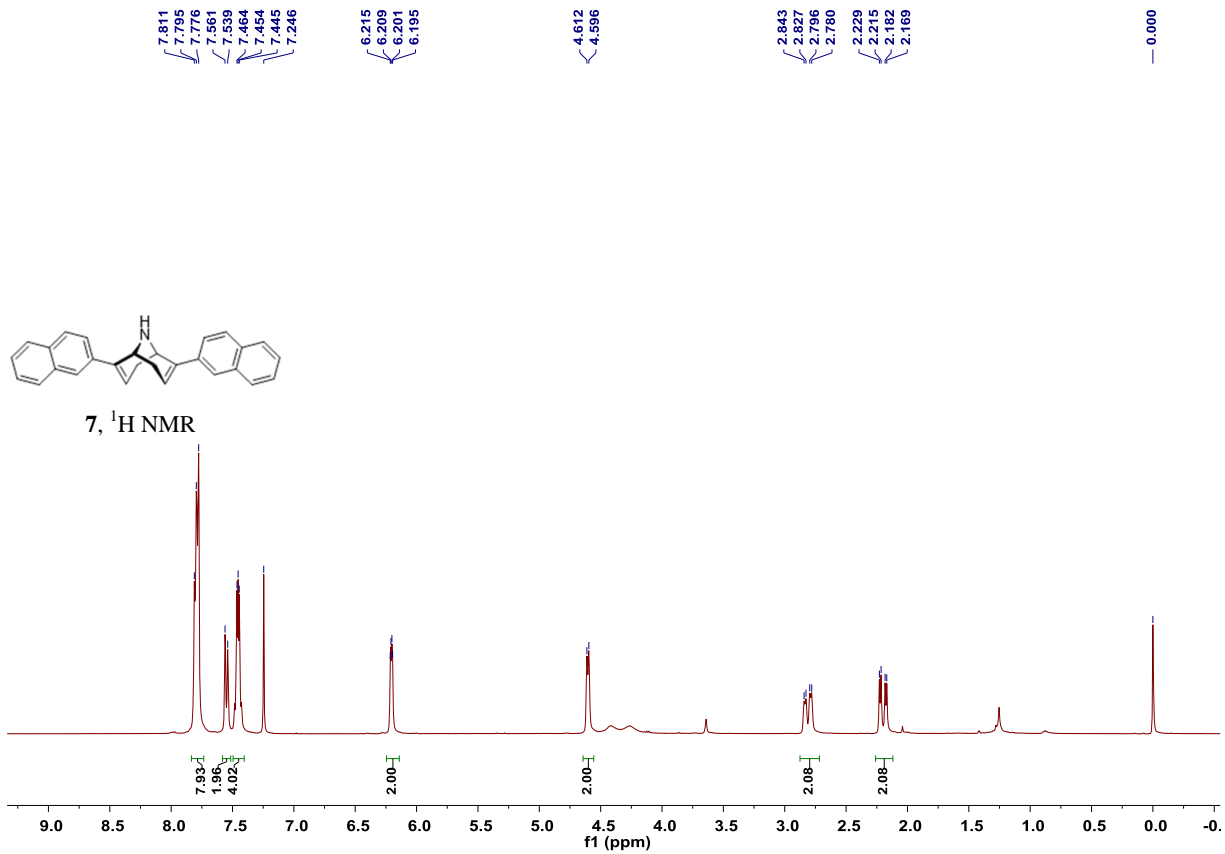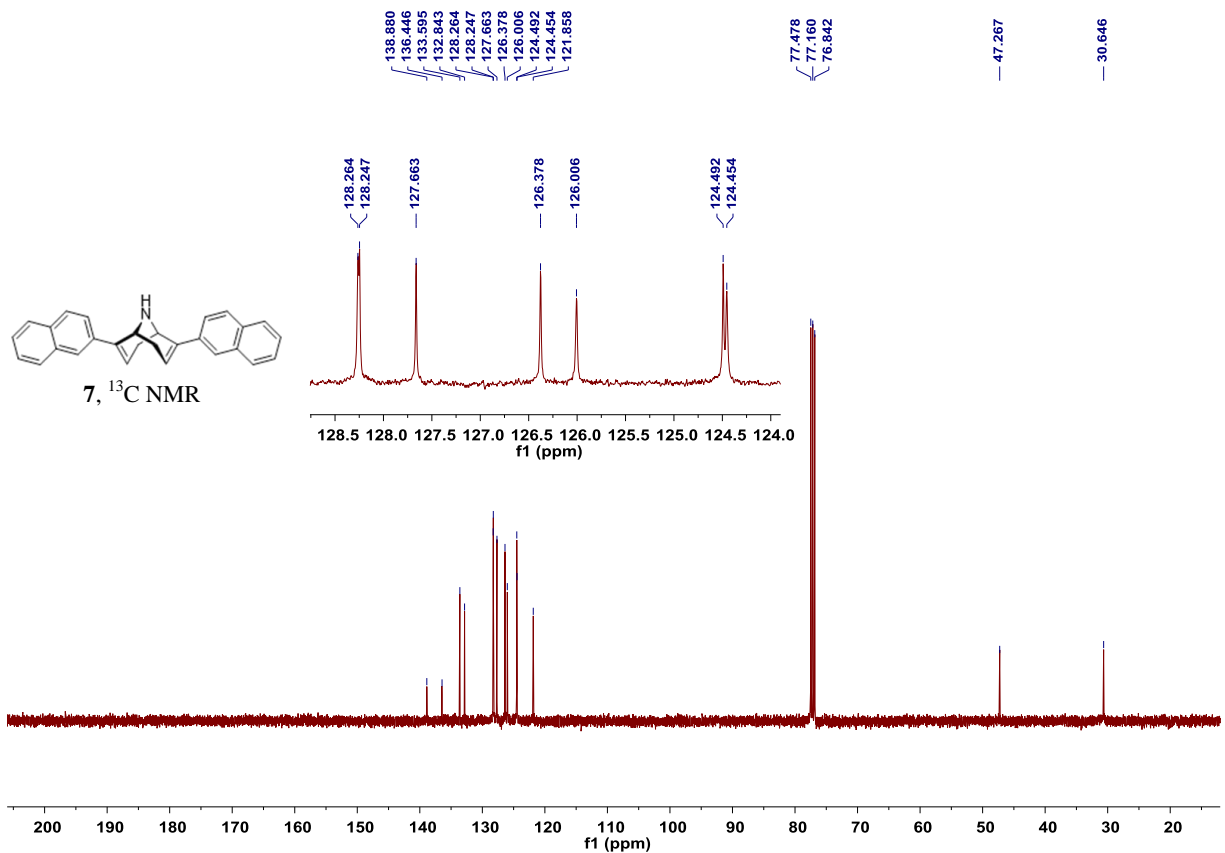

Supplement: d1qo00852h1.pdf [file d1qo00852h1.pdf]
